# 1 Genomic expansion of archaeal lineages resolved from deep Costa Rica sediments

2 Ibrahim F. Farag<sup>1</sup>, Jennifer F. Biddle<sup>1</sup>, Rui Zhao<sup>1</sup>, Amanda J. Martino<sup>2</sup>, Christopher H. House<sup>3</sup>,

3 Rosa I. León-Zayas<sup>1,4</sup>

4 <sup>1</sup>School of Marine Science and Policy, University of Delaware, Lewes DE 19968

5 <sup>2</sup>Department of Biology, St. Francis University, Loretto PA 15940

6 <sup>3</sup>Department of Geosciences, Pennsylvania State University, University Park PA 16802

7 <sup>4</sup>Department of Biology, Willamette University, Salem OR 97301

8

## 9 Abstract

10 Numerous archaeal lineages are known to inhabit marine subsurface sediments, although their  
11 distributions, metabolic capacities and interspecies interactions are still not well understood.

12 Abundant and diverse archaea were recently reported in Costa Rica (CR) margin subseafloor  
13 sediments recovered during IODP Expedition 334. Here, we recover metagenome-assembled  
14 genomes (MAGs) of archaea from the CR-margin and compare them to their relatives

15 from shallower settings. We describe 31 MAGs of 6 different archaeal lineages (*Lokiarchaeota*,  
16 *Thorarchaeota*, *Heimdallarchaeota*, *Bathyarchaeota*, *Thermoplasmatales* and *Hadesarchaea*) and  
17 thoroughly analyze representative MAGs from the phyla *Lokiarchaeota* and *Bathyarchaeota*.

18 Our analysis suggests the potential capabilities of *Lokiarchaeota* members to anaerobically  
19 degrade aliphatic and aromatic hydrocarbons. We show it is genetically possible and

20 energetically feasible for *Lokiarchaeota* to degrade benzoate if they associate with organisms  
21 using nitrate, nitrite and sulfite as electron acceptors, which suggests a possibility of syntrophic

22 relationships between *Lokiarchaeota* and nitrite and sulfite reducers. The novel *Bathyarchaeota*  
23 lineage possesses an incomplete methanogenesis pathway lacking the methyl co-enzyme M

24 reductase complex and encodes a non-canonical acetogenic pathway potentially coupling  
25 methylophony to acetogenesis via the methyl branch of Wood-Ljungdahl pathway. These novel  
26 metabolic characteristics suggest the potential of this *Bathyarchaeota* lineage to be a transition  
27 between methanogenic and acetogenic *Bathyarchaeota* lineages. This work substantially expands  
28 our knowledge about the metabolic function repertoire of marine benthic archaea.

## 29 **Introduction**

30 Marine subsurface sediments are full of diverse archaeal lineages[1], although their  
31 distributions, ecological roles and adaptation strategies are still not well understood[2][3][4][5].  
32 Metagenomic sequencing and single cell genomics have enabled the discovery of a great  
33 number of organisms, the elucidation of new metabolisms, the expansion of known lineages and  
34 the redefinition of portions of the tree of life[6][7], [8][9][10][11][12][13][14]. However, there is  
35 still a paucity of genomes resolved from the deep marine subsurface, meaning the niche specific  
36 adaptations in deep biosphere is not yet well understood.

37 Recently, the tree of life has been greatly expanded with the discovery of the *Asgard*  
38 superphylum, a deeply-branching monophyletic group thought to be some of the closest relatives  
39 to the eukaryotic branch of life[11][15]. Genome analyses of *Asgard* archaea have suggested  
40 diverse metabolic functions extending from an autotrophic lifestyle, primarily dependent on  
41 carbon fixation via Wood-Ljungdahl pathway and acetogenesis, to a heterorganotrophic lifestyle  
42 consuming proteins and aliphatic hydrocarbons, using methyl-CoM reductase-like enzymes, to  
43 recycle aliphatic hydrocarbons released from the subsurface[16][17][18]. *Asgard* members were  
44 proposed to be engaged in symbiotic partnerships involving syntrophic transfers of hydrogen and  
45 electrons following the ‘reverse flow model’ [16].

46 Members of another archaeal phylum in the deep subsurface, *Bathyarchaeota*, are  
47 characterized by their wide metabolic repertoire enabling heterotrophic scavenging of proteins,  
48 carbohydrates, short chain lipids and other reduced compounds as substrates as well as their  
49 methane-metabolizing potential [19]. However, bathyarchaeotal genomes have also suggested  
50 the potential for carbon fixation and acetogenesis [20]. The evolutionary path describing the  
51 acquisition of both methanogenesis and acetogenesis pathways in *Bathyarchaeota* remains  
52 unresolved [20][21].

53 Deep sediment from the Costa Rica (CR) margin subseafloor, sampled during the  
54 International Ocean Discovery Program (IODP) Expedition 334, was recently shown to host  
55 abundant archaea [22]. Here we examine in detail the archaeal genomes recovered from the  
56 Costa Rica Margin and compare them to their relatives recovered from shallower sites. In this  
57 study, we report 31 archaeal metagenome-assembled genomes (MAGs) belonging to six different  
58 archaeal lineages (*Lokiarchaeota*, *Thorarchaeota*, *Heimdallarchaeota*, *Bathyarchaeota*,  
59 *Thermoplasmatales* and *Hadesarchaea*) from the Costa Rica Margin subseafloor. We thoroughly  
60 analyze representative MAGs of two novel archaeal lineages belonging to phyla *Lokiarchaeota*  
61 and *Bathyarchaeota*. Our analysis suggests that *Lokiarchaeota* genomes encode for genes  
62 dedicated to process and degrade aliphatic and aromatic hydrocarbon anaerobically. We also  
63 describe a metabolically novel *Bathyarchaeota*, which lacks methyl co-enzyme M reductase  
64 (MCR) complex and possesses a non-canonical acetogenic pathway linking methylotrophy to  
65 acetogenesis via the methyl branch of Wood-Ljungdahl pathway. Lastly, we integrate genomic  
66 and thermodynamic modeling to underline the ecological and physiological conditions that could  
67 drive the syntrophic interactions among CR-*Asgards* and the development of non-canonical  
68 acetogenesis in CR-*Bathyarchaeota*.

69

## 70 **Results**

### 71 *Overall archaeal abundance and community structure*

72 High abundances of archaea across sediment samples collected from five depths located  
73 along Costa Rica Margin (2, 32 and 93 mbsf from Site 1378 and 22 and 45 mbsf from Site 1379  
74 of IODP Expedition 334), were previously reported[22]. Metagenomic data from these samples  
75 was assembled and examined for small subunit ribosomal genes. A total of 126 of 16S rRNA  
76 gene sequences were recovered from the metagenome assemblies. Sequences affiliated to  
77 archaea (31 sequences representing 25% of the total) reveal a wide diversity of lineages,  
78 including *Bathyarchaeota* (14 sequences representing 11 % of the total 16S rRNA gene  
79 sequences), *Thermoplasma* (5 sequences representing 4%) and *Lokiarchaeota* (4 sequences  
80 representing 3%) (Figure S1).

81 We compared two million raw metagenome reads (150 bp) for each dataset to the NCBI  
82 (nr) database [23]. Nearly 6-8% of the total short reads were successfully assigned to their  
83 respective phylogenetic group at the phylum level, while the phylogenetic signatures were not  
84 clear in the remaining reads (92-94%). The percentage of total prokaryote reads belonging to  
85 archaea ranged from 5% (at 93 mbsf, 1378) to 26% (at 32 mbsf, 1378).. Overall, community  
86 structure composition analysis conducted on metagenomic raw reads indicated the prevalence of  
87 two archaeal phyla in the Costa Rica margin: *Lokiarchaeota* and *Bathyarchaeota* (Figure 1B).  
88 *Lokiarchaeota* were most abundant among the archaea reads at the 32 mbsf samples in core  
89 1378, while *Bathyarchaeota* reads were most abundant at 22 mbsf and 45 mbsf in core 1379.

90

91

92 ***General genomic features of the abundant archaeal lineages***

93           Across the five-depths analyzed, 31 different draft archaeal MAGs were recovered (Table  
94 1). Genomic analyses were only performed on the 11 MAGs showing high completeness and low  
95 contamination percentages (above 60% completeness and below 5% contamination). Overall,  
96 completeness varied from 32% to 99% with an average of 50% and contamination varied from 0  
97 to 10% with an average of 8% (Table 1). Genome qualities were further assessed by comparing  
98 their predicted proteins against the NCBI (nr) database to evaluate the extent of phylogenetic  
99 consensus within the binned genomes (Figure 2A). Overall, the taxonomic affiliations of the  
100 majority of the predicted proteins (60-75%) in each genome agreed with their respective  
101 phylogenetic group, except CR-12 in which only 15% of the encoded proteins assigned to  
102 *Heimdallarchaeota* and was excluded from further analysis.

103           Phylogenetic placement of the draft genomes was determined using 16 ribosomal  
104 proteins (Figure 1A and Figure S2)[12]. The recovered MAGs were affiliated to six different  
105 phylogenetic lineages, namely, *Lokiarchaeota*, *Thorarchaeota*, *Heimdallarchaeota*,  
106 *Bathyarchaeota*, *Thermoplasmatales* and *Hadesarchaea*.

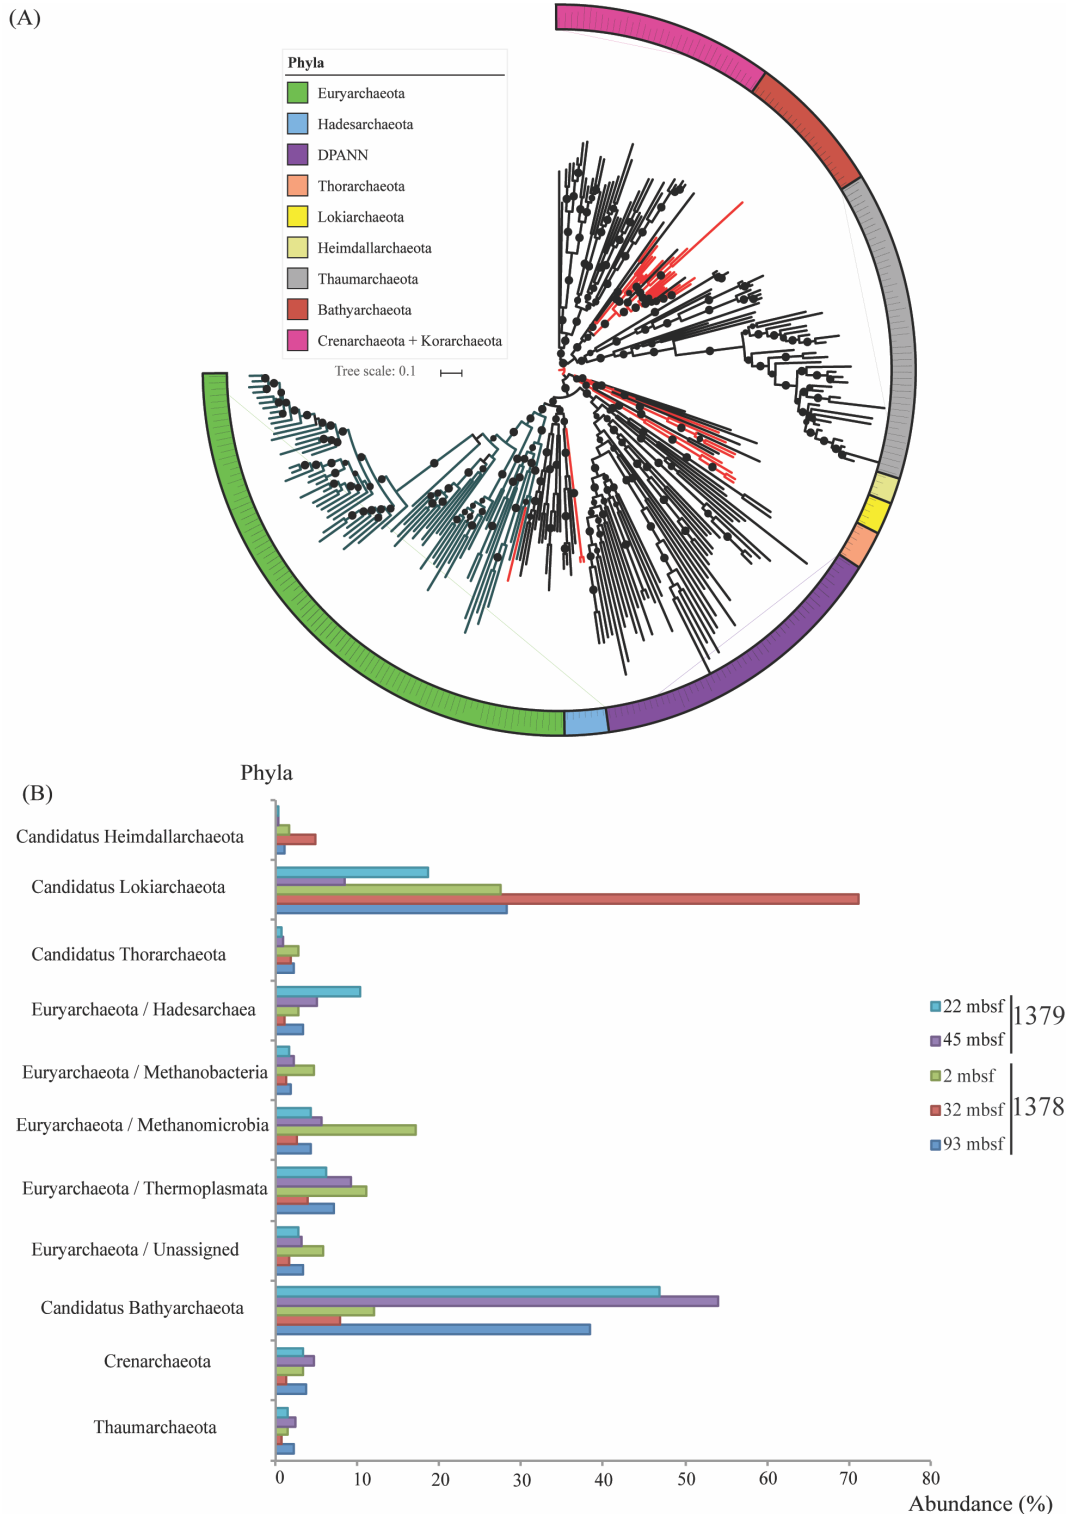

107

108 **Figure 1. (A) Phylogenetic placement of the Costa Rica archaeal draft genomes (genomes of this study are**

109 **highlighted in red).** The maximum-likelihood phylogenetic tree was calculated based on the concatenation of 16

110 ribosomal proteins (L2, L3, L4, L5, L6, L14, L15, L16, L18, L22, L24, S3, S8, S10, S17, and S19) retrieved from

111 the Costa Rica archaeal genomes and 231 reference archaeal genomes representing 13 different archaeal phyla. The  
 112 relationships were inferred using the best fit substitution model (VT+F+R10) and nodes with bootstrap support  
 113 >80% were marked by black circles. Scale bar indicates substitutions per site. The tree is available with full  
 114 bootstrap values in Newick format in the Supplementary Data.

115 **(B) Relative abundance percentages of all archaeal lineages making up > 1% of the total communities.** This  
 116 graph was calculated by parsing the raw reads against NCBI (nr) database applying e-value cut off score 1e-5.

117 ***Distribution of Eukaryotic signature protein (ESP) homologs in Costa Rica archaea MAGs***

118 All archaeal MAGs recovered from Costa Rica sediments encoded eukaryotic signature  
 119 proteins (ESPs). These ESPs include protein homologs dedicated for information processing,  
 120 trafficking machineries, ubiquitin system, cell division and cytoskeleton formation. The *Asgard*  
 121 archaea genomes recovered from CR, e.g. *Heimdallarchaeota* and *Lokiarchaeota* MAGs  
 122 (CR\_06, CR\_11), showed significantly higher numbers of eukaryotic homologs and covered  
 123 broader classes of ESPs (Figure 2b). However, ESPs were also detected in the *Bathyarchaeota*,  
 124 *Hadesarchaeota* and *Thermoplasmata* MAGs recovered from CR (Figure 2b). Yet, only the  
 125 *Asgard* genomes have the homologs for cell division and cytoskeleton.

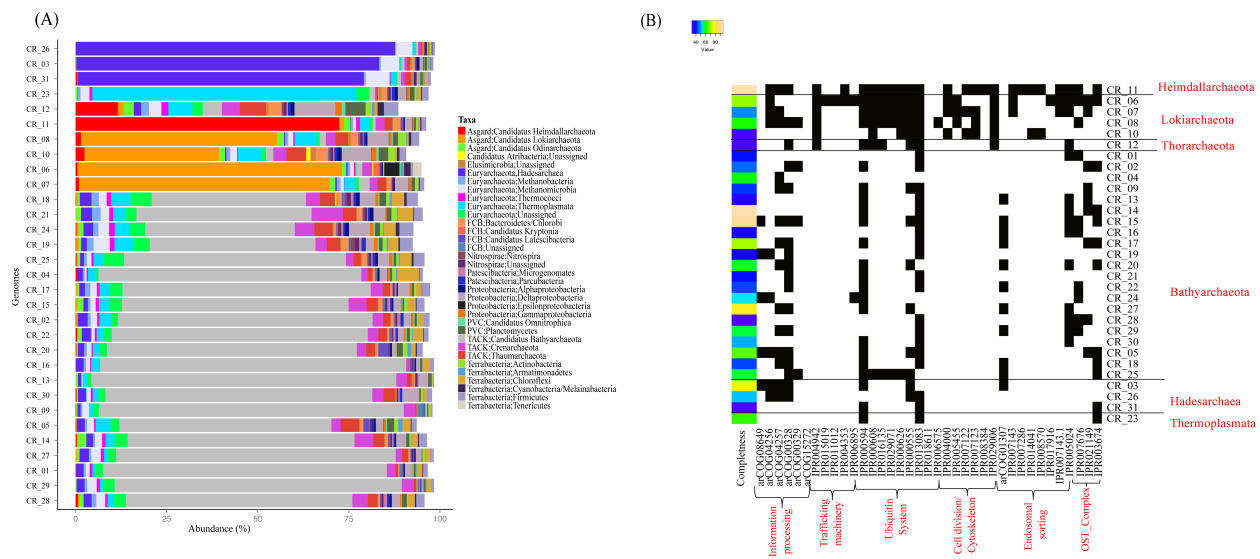

126  
 127 **Figure 2. (A) Phylogenetic distributions of the predicted proteins encoded by the archaeal MAGs, the**  
 128 **phylogenetic assignments were performed through comparing the proteins to the NCBI (nr) proteins**

129 **database via the DarkHorse software[23]. (B) Heat map shows the presence (black) /absence (white)**  
130 **patterns of eukaryotic homologs in the recovered archaea MAGs.** The color along the left side shows the  
131 completeness of the genome bin, as less complete bins would be expected to contain fewer homologs. Only the  
132 *Asgard* archaea contain cell division/cytoskeleton homologs.

### 133 ***Genomic evidence of CR\_Asgard hydrocarbon utilization***

134 We screened all of the MAGS, assembled metagenomes and raw reads for the presence  
135 of genes encoding for MCR complex to assess the role of the archaeal members in mediating the  
136 degradation of hydrocarbon compounds (Figure 3A) that are abundant in Costa Rica (CR)  
137 margin [24]. MCR complex genes (*mcrABCDG*) were completely absent from both the MAGs  
138 and the entire metagenomes, which indicates that short chain alkanes are not oxidized using  
139 MCR complex in CR sediments. All metagenomic reads and MAGs were screened for possible  
140 alternative hydrocarbon degradation pathways using custom HMM searches specifically  
141 targeting key metabolic genes for aliphatic and aromatic hydrocarbons degradation pathways  
142 (Figure 3A). Multiple pathways were successfully identified including glycyl-radical enzymes  
143 (GREs) related genes coupled with *n*-alkane succinate synthase (AssA) and benzylsuccinate  
144 synthase (BssA), which activates *n*-alkanes and mono-aromatic compounds, respectively, by  
145 forming C-C bond between these compounds and fumarate to form hydrocarbon adducts  
146 [25][26]. Benzylsuccinate synthesis is the initial step for aromatic hydrocarbon mineralization, in  
147 which benzylsuccinate is converted to benzoyl-CoA[25]. Interestingly, the capability of ATP-  
148 dependent Benzoyl-CoA reductase (BCR) complex utilization was identified in some CR *Asgard*  
149 members (*Lokiarchaeota*, *Thorarchaeota* and *Heimdallararchaeota*) (Figure 3). This reaction  
150 can dearomatize the benzoyl-CoA to dienoyl-CoAs as the first step in aromatic hydrocarbon  
151 degradation and then couple this reaction with a beta-oxidation pathway to ultimately produce  
152 acetyl-CoA, similar to the mechanism previously reported in the denitrifying bacteria *Thauera*



153 *aromatica* [27]. Since *Lokiarchaeota* CR\_06 had the least contamination levels <2%, we used  
154 this MAG to verify the presence of aromatic hydrocarbon degradation function mediated by  
155 BCR complex in *Asgards*. Phylogenetic analysis of the BCR subunit B recovered from  
156 *Lokiarchaeota* CR\_06 showed their affiliation to class Bzd, which is composed of four subunits  
157 (BzdONPQ) (Figure 3C). This BCR type was originally discovered in *Betaproteobacteria*,  
158 *Azoarcus evansii* and the ones detected in CR\_06 is closely related to BCRs detected in different  
159  $\beta$ ,  $\delta$  *proteobacteria*, and other archaeal lineages (e.g. *Lokiarchaeota*, *Bathyarchaeota* and  
160 *Archaeoglobus*) (Figure 3C)[28]. Subunits P and Q have ATP binding/ATPase functional  
161 domains and are linked together by a [4Fe-4S] cluster. Reduced ferredoxins transfer electrons to  
162 the CoA- ester-binding domains (subunits O and N), which catalyzes the cleavage of benzoyl-  
163 CoA aromatic ring and yields dienoyl CoA product (Figure 3A) [28]. In CR\_06, the four  
164 subunits of BCR complex were located in one contiguous operon (CR\_06- contig-100\_3495),  
165 however due to the high fragmentation of the genomes no reliable phylomarker genes were  
166 found in the adjoining genomic neighborhoods. A plausible explanation for the high  
167 fragmentation levels of the CR\_06 (number of scaffolds= 1110), even though the genome  
168 exhibited high coverage levels >200x, is that there are high levels of intra-lineage strain  
169 heterogeneity. This is confirmed by the ANI values (ANI=70-80%) between MAGs of the same  
170 phylogenetic group and disparities in their coverage levels (table 1 and table S3).

171 The affiliations of the BCR complex related proteins, BCRA and BCRB in  
172 *Lokiarchaeota* CR\_06 were confirmed by the following observations: 1) contigs encoding for  
173 the four subunits of BCR complex fall within the same coverage and GC% range of the rest of  
174 the contigs in the same MAG (Figure S3); 2) phylogenetic trees of BzdO and Q protein  
175 sequences detected in the CR\_06 were placed as siblings to BCR sequences belonging to



185 molecules are shown in dark green, metabolite and amino acid transporters are shown in light green, and cation  
186 transporters are shown in dark blue. **(B) Distribution patterns of the hydrocarbon degradation pathways among  
187 the constructed CR-Archaea genomes.** Genomes were clustered based on presence (black) /absence (white)  
188 profiles using Euclidean distance and average linkage method. X axis represents enzymes included in the analysis,  
189 bottom bars are the pathways that these enzymes represent and y axis includes bin names/phylogenetic affiliations.  
190 **(C) Maximum likelihood tree of the benzoyl-CoA reductase subunit B.** The tree was calculated using the best fit  
191 substitution model (VT+F+R7) that describes the evolutionary relationships between BCRB families. The tree was  
192 made using reference sequences under the KEGG entry (K04113) collected from AnnoTree[30] and branch location  
193 was tested using 1000 ultrafast bootstraps and approximate Bayesian computation, branches with bootstrap support  
194 >80% were marked by black circles. Blue and Red clades highlight sequences belong to Bzd\_O and BCR\_B  
195 subfamilies, respectively. Scale bar indicates substitutions per site. Sequences from CR\_*Lokiarchaeota* bins was  
196 marked with red circles, CR\_*Thorarchaeota* bin was marked with light blue and CR\_*Heimdallarchaeota* was  
197 marked with green. Candidate novel clades present in the Costa Rica metagenomic datasets were marked with  
198 purple stars. The tree is available with full bootstrap values in Newick format in the Supplementary Data.

### 199 ***Fate of the degraded aromatic hydrocarbons and syntrophic interactions***

200 CR\_*Lokiarchaeota* (CR\_06) as well as other *Asgard* in the CR margin could potentially grow  
201 heterotrophically on aromatic hydrocarbons. Though, the absence of genes encoding for different  
202 types of cytochrome oxidase and anaerobic respiration from the genome content of the *Asgard*  
203 MAGs (CR\_06, 07, 08, 11 and 12) indicate their inability to completely mineralize these  
204 hydrocarbons to CO<sub>2</sub> and H<sub>2</sub>O, which would allow a high energy yield. They encode for the  
205 genes mediating the fermentation of these organic macromolecules to acetate and other reduced  
206 products, which is thermodynamically unfavorable under CR conditions with a positive  $\Delta rG'$   
207 value ( $\Delta rG' = 196.3$  [kJ/mol]) (Figure 3 and table S1), suggesting that these genes are maintained  
208 due to a thermodynamically favorable force. Due to the genome incompleteness (86% complete),  
209 we cannot rule out the possibility for the presence of complete aromatic hydrocarbon

210 mineralization pathways using one or more of oxidized substrates as electron sinks (Table 1).  
211 More likely, however, *Lokiarchaeota* are gaining energy through syntrophic interactions with  
212 partners capable of oxidizing the biodegradation intermediates.  
213 Here, we inferred the identity of the potential syntrophic partners under marine subsurface  
214 conditions by comparing all the possible metabolic and thermodynamic scenarios, gauging each  
215 scenario based on the presence of the metabolic pathways in our metagenomic datasets and the  
216 thermodynamic feasibility under each condition (Figure 3B, Table S1 and S6). We calculated the  
217 Gibbs free energy of coupled reactions under a wide range of substrate concentration conditions:  
218 Reaction 1-5 (Table S1, Figure S5). Best conditions suggest that the degradation of benzoate (the  
219 central metabolic intermediate in aromatic hydrocarbon degradation pathways) potentially occurs  
220 under the following metabolic conditions (a, b, and c): (a) benzoate mineralization to CO<sub>2</sub> and  
221 H<sub>2</sub>O coupled with nitrite reduction to ammonia ( $\Delta rG' = -1206.3$  [kJ/mol]); (b) benzoate  
222 mineralization to CO<sub>2</sub> and H<sub>2</sub>O coupled with sulfite reduction to hydrogen sulfide ( $\Delta rG' = -373.6$   
223 [kJ/mol]); and (c) benzoate mineralization to CO<sub>2</sub> and H<sub>2</sub>O coupled with nitrate reduction to  
224 nitrite ( $\Delta rG' = -119.9$  [kJ/mol]).

225         The type and complexity of the exchanged substrates are another key factor that may  
226 shape the syntrophic relationship and the identity of the syntrophic partners of *Lokiarchaeota*..  
227 The presence of genes encoding for membrane bound electron bifurcating classes of [NiFe]  
228 hydrogenases, groups 3b and 3d, which couple the oxidation of NADH<sup>+</sup> and NADPH<sup>+</sup> with H<sub>2</sub>  
229 evolution (Figure S6)[31] also suggests there is syntrophic exchange of hydrogen between  
230 *Asgard* and their partners. Additionally, we located genes encoding for  $\beta$ -oxidation enzymes  
231 (enoyl-CoA hydratase, acyl CoA dehydrogenase, and acetyl CoA acetyl transferase) and various  
232 fermentation pathways (acetate and formate) ) in *Lokiarchaeota* CR\_06, which suggests that

233 short chain fatty acid and different fermentation products could also be syntrophically exchanged  
234 (Table S4). The diverse nature of substrates could facilitate the interactions between a broader  
235 range of partners of diverse metabolic capabilities and support the conclusions driven from our  
236 thermodynamic calculations.

237 It is worth noting that efficient substrate and electron exchange between syntrophic partners  
238 require the presence of either biological conduits (e.g. type IV pili or flagella) or some sort of  
239 electron shuttles allowing extracellular electron transfers (e.g. multiheme cytochromes) [32][33].  
240 Hence, we screened CR\_06 for these mechanisms and identified two candidate mechanisms for  
241 interspecies substrate and electron exchange. First, flagellar proteins are encoded by the CR\_06,  
242 suggesting flagella as a potential structure mediating inter-species interactions. Second, CR\_06  
243 harbors a gene encoding for an oxidoreductase belonging to electron transfer flavoprotein-  
244 quinone oxidoreductase (CR\_06\_contig-100\_4953\_2), ETF-QO/FixC family, which potentially  
245 mediating the transfer of electrons across membranes.

#### 246 ***Other metabolic features of Lokiarchaeota (CR\_06)***

247 The genomic analysis of *Lokiarchaeota* (CR\_06) MAG also suggests versatile catabolic  
248 capacities potentially targeting detrital proteins and short chain fatty acids (e.g. propanoate,  
249 butyrate), which are abundant in benthic marine sediments. CR\_06 MAG has a relatively large  
250 number of peptidases encoding genes (92 peptidases/1Mbp) with diverse catalytic residues (e.g.  
251 aspartic, metallo, serine, etc.), which potentially degrade detrital proteins (Figure S7). It also  
252 contains genes encoding for various classes of facilitated and active transporters, which are  
253 dedicated to shuttle oligo/di-peptides and single amino acids (e.g. polar and branched chain  
254 amino acids) across the cell membrane. Also, CR\_06 encoded for enzymes enabling the

255 utilization of wide range of amino acids (e.g. aspartate, threonine, alanine, glycine, serine,  
256 cysteine, histidine, glutamine, and lysine), channel them to the central metabolic pathways and  
257 ultimately produce energy via fermentation (Figure 3A).

258 CR\_06 MAG suggested the capacity to break down short chain fatty acids e.g.  
259 propanoate, oxo-butanoate as other potential substrates. Both propanoate and oxo-butanoate are  
260 converted to propanoyl CoA via formate acetyl transferase and acetyl synthase, respectively.  
261 Then, the resulting propanoyl CoA is converted to acetyl-CoA via malonyl-CoA pathway.  
262 CR\_06 as well as other *Asgards* showed different autotrophic capacities enabling carbon fixation  
263 to complex organic carbon compounds using both the Wood-Ljungdahl (WL) pathway and the  
264 reverse tricarboxylic acid (rTCA) cycle (Figure 3A).

#### 265 ***Metabolic features of CR-Bathyarchaeota***

266 The other main lineage of Archaea in these sediments is *Bathyarchaeota*. *Bathyarchaeota*  
267 CR\_14 is described in details since it has the highest quality at >95% complete and 4%  
268 contaminated. Phylogenomic analysis of *Bathyarchaeota* MAGS showed that CR\_14 is clustered  
269 together with other CR\_ *Bathyarchaeota* in two distinct clades within *Bathyarchaeota* phylum  
270 (Figure S2). Also, relatively low similarity scores were observed between CR\_14 and other  
271 reference *Bathyarchaeota* MAGs, which suggest that CR\_14 belongs to a novel *Bathyarchaeota*  
272 class (Table S2).

273 Metabolic analysis revealed that CR\_14 harbors genes encoding for incomplete  
274 methylotrophic methanogenesis pathway, yet is missing the key genes encoding for MCR  
275 complex (*mcrABCDG*). The absence of this complex suggests that CR\_14 is incapable of  
276 methanogenesis and methane metabolic genes may be rewired to perform different functions,

277 where they recycle methyl groups from different methylated compounds and replace the  
278 functions of methyl branch in Wood-Ljungdahl pathway (Figure 4-A). CR\_14 showed the  
279 potential capability to use formate as electron and hydrogen donor through using Group 4  
280 hydrogenases (formate hydrogenlyases) (Figure S6)[31], and these electrons reduce  
281 trimethylamine N-oxide (TMAO) to trimethylamine via trimethylamine-oxide reductase or  
282 anaerobic dimethyl sulfoxide reductase (TMAO/DMSO reductase)[34]. Together the presence of  
283 genes encoding for trimethylamine-specific corrinoid protein as well as diverse classes of  
284 methyltransferases, CoB—CoM heterodisulfide reductase/ F420 nonreducing hydrogenase  
285 (hdrABCD and mvhADG) suggest the capability of CR\_14 to recycle coenzyme M (CoM) and  
286 coenzyme B (CoB) and transfer the methyl group from trimethylamine to CoM-SH[20][35]. We  
287 located genes encoding the tetrahydromethanopterin S-methyltransferase (mtrA-H), suggesting  
288 that mtrA protein transfers the methyl group from CoM to 5,6,7,8-Tetrahydromethanopterin  
289 (H<sub>4</sub>MPT) and assimilates the methyl group into acetyl-CoA via the beta subunit of CODH/ACS  
290 complex, replacing the function of the methyl branch of Wood-Ljungdahl pathway. This agrees  
291 with our finding that only the genes encoding for the carbonyl branch of Wood-Ljungdahl coupled  
292 with acetate fermentation genes (acetogenesis) were present in CR\_14 and the genes encoding  
293 for methyl branch were completely missing for the same pathway. These collective metabolic  
294 features in *Bathyarchaeota* CR\_14 suggest this genome may be a *Bathyarchaeota* lineage that  
295 bridges the gap between methanogenic and acetogenic *Bathyarchaeota* through adopting a non-  
296 canonical acetogenic life style (Table S5) [20][21].

297           Although the proposed scenario where CR\_14 performs acetogenesis instead of  
298 methanogenesis is metabolically feasible, it is not clear why CR\_14 invests a large amount of  
299 energy to maintain genes for methane metabolism. A plausible explanation for expressing

300 methanogenesis-related genes is the lack of dedicated methyltransferases that could transport  
301 methyl groups directly between methylated compounds (e.g. trimethylamine) to  
302 Tetrahydromethanopterin (H<sub>4</sub>MPT). Therefore, encoding genes mediating the synthesis and  
303 cycling of CoM is necessary to use it as intermediate carrier to transport methyl groups from/to  
304 H<sub>4</sub>MPT. Also, the phylogenetic tree of the acetyl-CoA synthase beta subunit (AcsB) showed that  
305 CR\_14 AcsB genes clustered together with genes recovered from other *Bathyarchaeota* lineages,  
306 *Asgards*, *Chloroflexi* and *Altiarchaeales* (Fig 4-B). The uniqueness of that clade stemmed from  
307 the previous hypothesis that *Altiarchaeales* members possess an ancient version of AcsB [36].  
308 Likewise, members of *Chloroflexi* encoded for this archaeal version of ACS $\beta$  subunit similar to  
309 the ones present in *Bathyarchaeota*, *Asgards*, and *Altiarchaeales* [37][38]. Finally, this ACS type  
310 supports the hydrogen dependent, autotrophic life style of *Asgards* [16]. Accordingly, we  
311 hypothesize that *Bathyarchaeota* possess the type of ACS capable of incorporating methyl  
312 groups into acetyl-CoA utilizing different carrier proteins (CoM, H<sub>4</sub>MPT and may be other  
313 unknown carriers), allowing *Bathyarchaeota* to assimilate methyl groups originated from various  
314 methylated compounds.



(A)

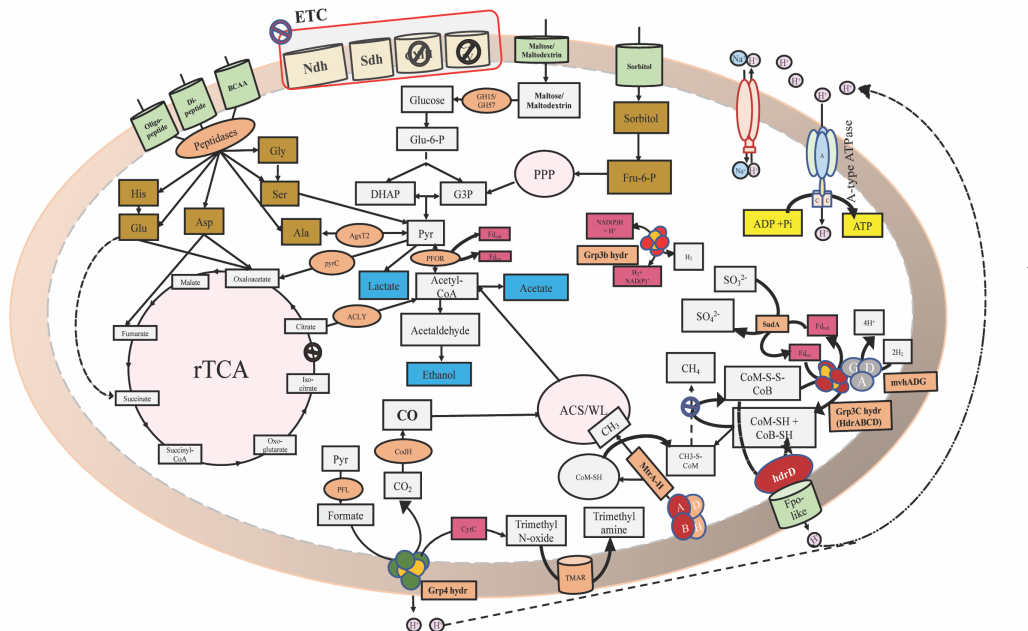

(B)

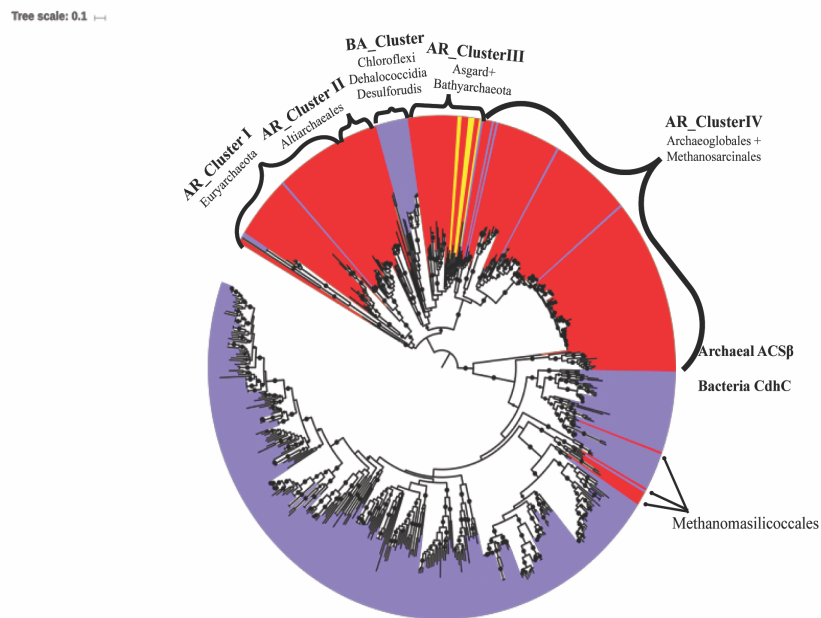

315

316 **Figure 4. (A) Metabolic reconstruction of the Bathyarchaeota bin CR\_14.** Central metabolic pathways found in  
 317 the genome (glycolysis, carbonyl branch of Wood-Ljungdahl, and methanogenesis related genes) are shown in gray  
 318 boxes, carbon fixation pathways (ACS/WL, PPP and rTCA cycles) are shown in pink, electron transport chain

319 (ETC) proteins are shown in yellow, fermentation products are shown in blue boxes, amino acids are shown in  
320 brown boxes, enzymes and enzyme complexes are shown in orange circles, energy carriers are shown in red,  
321 metabolite and amino acid transporters are shown in light green. **(B) Maximum likelihood tree of the acetyl CoA  
322 synthase  $\beta$  subunit (ACS $\beta$ /CdhC).** The tree was calculated using the best fit substitution model (LG + R9) that  
323 describes the evolutionary relationships between ACS families. The tree was made using reference sequences under  
324 the KEGG entry (K00193) collected from AnnoTree[30] and branch location was tested using 1000 ultrafast  
325 bootstraps and approximate Bayesian computation, branches with bootstrap support >80% were marked by black  
326 circles. Blue and Red clades highlight sequences belong to bacterial (CdhC) and archaeal (ACS $\beta$ ) versions,  
327 respectively. Scale bar indicates substitutions per site. Sequences from CR\_*Lokiarchaeota* and CR\_*Bathyarchaeota*  
328 bins were shaded with yellow. The tree is available with full bootstrap values in Newick format in the  
329 Supplementary Data.

330

## 331 **Discussion**

332 In this study, we employed a metagenomics-enabled genomics approach to recover  
333 representative MAGs from the abundant archaeal phyla inhabiting deep sediments of Costa Rica  
334 margin and elucidate their potential ecological roles. A total of 31 MAGs belonging to archaeal  
335 phyla (*Lokiarchaeota*, *Thorarchaeota*, *Heimdallarchaeota*, *Bathyarchaeota*, *Thermoplasmatales*  
336 and *Hadesarchaea*) were successfully recovered from five metagenomic datasets representing  
337 five different samples. Only 11 MAGs met our completion and contamination thresholds, >60%  
338 complete and <10% contamination, to be considered for the detailed genomic analyses and  
339 metabolic reconstruction. More than 90% of the high-quality genomes were affiliated to  
340 *Bathyarchaeota* and *Asgard* and the phylogenetic affiliations of the predicted proteins in each  
341 MAG confirmed the proper quality of the MAGs considered in this study. Remarkably, all the  
342 CR archaeal MAGs were enriched with ESP encoding genes. The wide distribution of these

343 eukaryotic homologs indicates that ESPs are more ubiquitous in anaerobic archaea than  
344 previously recognized.

345 Notably, the sediments used in this study were collected from much deeper sites  
346 compared to the sediment where previously reported *Bathyarchaeota* and *Lokiarchaeota* were  
347 found. As such, our analysis was focused on MAGs belonging to *Bathyarchaeota* and  
348 *Lokiarchaeota* to try to understand their ecological potentials under these deep marine sediment  
349 conditions.

### 350 ***Community interactions and Lokiarchaeota metabolic interdependencies***

351 Deep marine sediments are rich in aliphatic and aromatic hydrocarbons that provide the  
352 associated microbes with a significant portion of their energy and carbon needs [39][40].  
353 Previous studies showed that hydrocarbon degradation is restricted to limited bacterial and  
354 archaeal phyla (e.g. *Aminicenantes*, *TA06*, *Aerophobetes*, *Atribacteria*, *Helarchaeota* and  
355 *Bathyarchaeota*) [18][20] [41]. However, the full spectrum of archaea involved in the  
356 hydrocarbon degradation processes and the nature of their interactions are not fully elucidated. In  
357 the light of the above evidence, this study provides new views regarding the ecological roles and  
358 potential metabolic capacities of *Lokiarchaeota*. CR\_*Lokiarchaeota* genome analysis expanded  
359 the range of metabolic features encoded by this phylum and predicts metabolic functions  
360 enabling the utilization of aliphatic and aromatic hydrocarbons as carbon and energy sources.  
361 Considering the high energy demands for aromatic hydrocarbon breakdown under the energy  
362 limited conditions of subseafloor sediments [28], it was unexpected to find the ATP-dependent  
363 BCR complex (class Bzd) in CR-*Asgards*/CR-*Lokiarchaeota* genomes while they have  
364 fermentation and/or acetogenic life styles. This strongly suggests that acetogenesis or acetate  
365 fermentation cannot be the ultimate fate of the aromatic hydrocarbon degradation process due to

366 the low energy yields of these pathways. Under these circumstances, we propose that the CR-  
367 *Lokiarchaeota* members have the capacity of completely mineralizing aromatic hydrocarbons in  
368 syntrophy with microbes capable of using nitrite, sulfite and nitrate as electron sink under the  
369 subsurface settings to increase their energy budgets and sustain their energy requirement. After  
370 testing all possible partnership scenarios based on the presence/absence profiles of the candidate  
371 pathways and the thermodynamic feasibility (Figure 5 A-B), we found many potential partners  
372 for *Lokiarchaeota* belong to diverse metabolic groups (e.g. nitrate reducers, nitrite reducers,  
373 sulfate reducers, sulfite reducers and thiosulfate reducers), however only sulfite, nitrate and  
374 nitrite reducers are thermodynamically favored. In the same context, a diverse group of  
375 syntrophs might require sharing substrates of different qualities (e.g. acetate, propanoate, and  
376 other short chain fatty acids). Accordingly, this suggests the presence of *Lokiarchaeota*  
377 syntrophic partners capable of acetate oxidation and short chain fatty acid oxidation in addition  
378 to the hydrogenotrophic ones as previously proposed [16]. Therefore, we hypothesize that  
379 thermodynamic favorability and potential diversity of the shared metabolites will push the  
380 *Lokiarchaeota* to syntrophy, beyond individual metabolite exchange.

### 381 ***CR-Bathyarchaeota bridge the gap between acetogenic and methanogenic lineages***

382 *Bathyarchaeota* have been shown to have both methanogenic and acetogenic lifestyles [20][21],  
383 yet the evolutionary trajectory and the ecological context driving the switch between lifestyles  
384 are not fully understood. Generally, *Bathyarchaeota* lineages are widely distributed in different  
385 benthic marine habitats compared to methanogenic ones [19], which could be explained by their  
386 acetogenesis capacity that enables the degradation of wide range of organic compounds under  
387 thermodynamic favorable conditions [42].

388            Interestingly, phylogenomic analysis revealed that CR\_ *Bathyarchaeota* MAGs are  
389 potentially affiliated to novel class that are significantly divergent from previously reported  
390 acetogenic and methanogenic lineages. In these CR sediments, distinct environmental conditions  
391 may have captured the intermediate transition between acetogenic and methanogenic lifestyles.  
392 We propose that these environmental conditions include the presence of high levels of  
393 methylated compounds (e.g. methylated amines) in deep-sea environments [43] and the absence  
394 of dedicated pathways/carriers necessary to recycle these methylated compounds and directly  
395 shuttle the extracted methyl groups to the Wood-Ljungdahl pathway. Also, there is a relatively  
396 high redox potential and substantial abundance of oxidized substrates that could serve as  
397 terminal electron acceptors in CR sediments, this may not favor the occurrence of full  
398 methanogenesis and the associated methanogenic archaea, as indicated by the absence of *mcrA*  
399 genes at the sampled depths (Figure 5A).

400            In summary, this study presents a large dataset of subsurface archaeal MAGs, some of  
401 which are high completeness and quality. Numerous archaeal MAGs host eukaryotic signatures,  
402 yet, only the *Asgard* genomes have the homologs for cell division and cytoskeleton. We also  
403 report a metabolically novel *Lokiarchaeota* lineage capable of aliphatic and aromatic  
404 hydrocarbon degradation with a putative partnership with metabolically diverse syntrophic  
405 organisms. Also, we revealed the presence of intermediate stage between acetogenic and  
406 methanogenic *Bathyarchaeota* that could convert methylated amines to acetate through linking  
407 methylotrophy to acetogenesis.

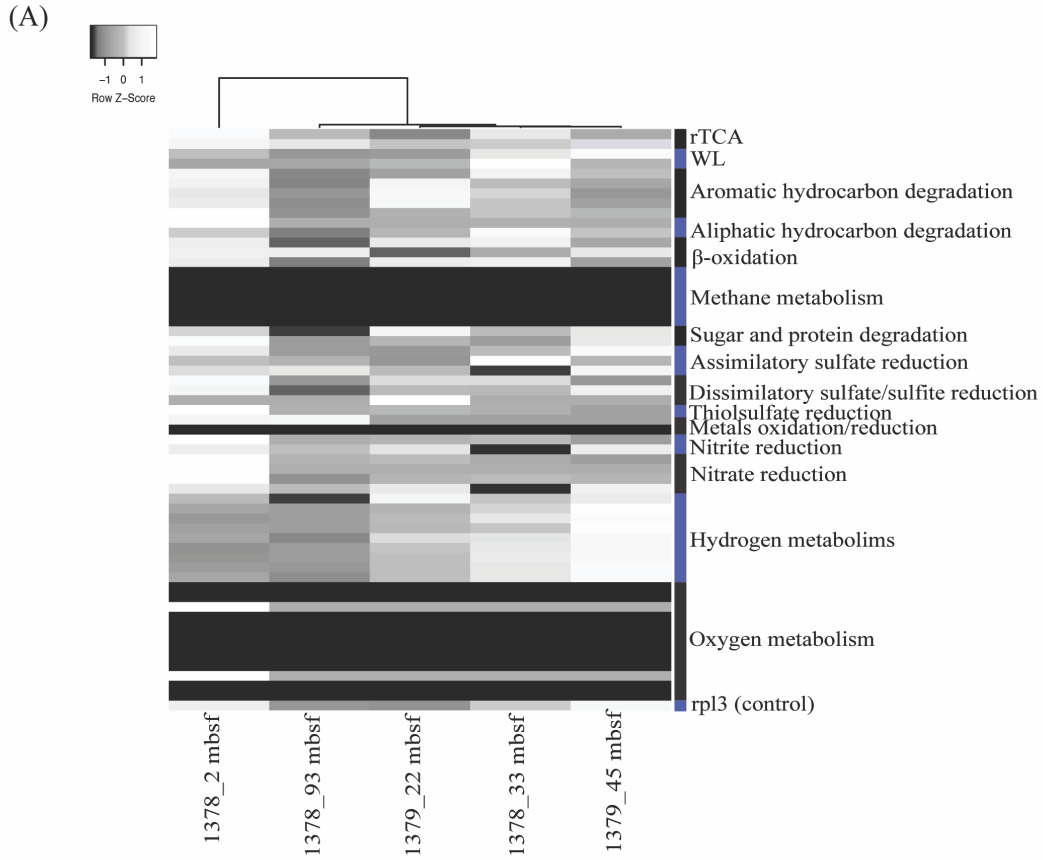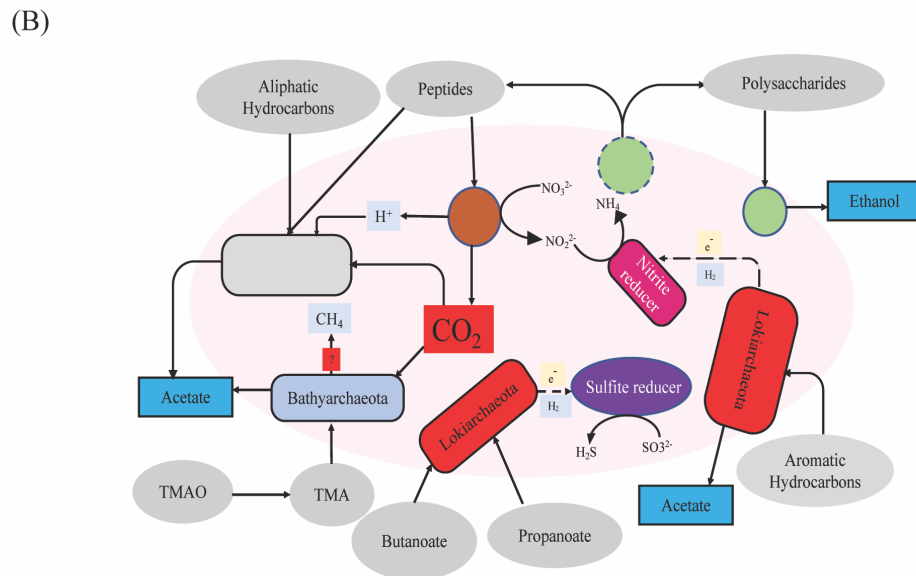

409 **Figure 5. (A) Heat map depicts the distribution patterns of the key metabolic pathways across all sampled**  
410 **metagenomic datasets.** Metagenomes were clustered based on presence (black) /absence (white) profiles using  
411 Euclidean distance and average linkage method. Y axis represents pathways included in the analysis and x axis  
412 includes metagenomic datasets analyzed. **(B) Hypothetical models for the microbial interactions in the Costa**  
413 **Rica sediments.** The potential substrates degraded by *Lokiarchaeota*, *Bathyarchaeota* and other microbes in the  
414 environment were colored in grey, potential metabolic products (in blue), potential interactions between  
415 *Lokiarchaeota* and their syntrophic partners and possible shared metabolites

## 416 **Materials and Methods**

### 417 *Site information and Sample collection*

418 Samples used in this study were collected under aseptic conditions from Sites U1378 and  
419 U1379 of Costa Rica Margin during IODP Expedition 334. The sample depths are in the range of  
420 2 – 93 meters below seafloor (mbsf). Detailed site descriptions were previously reported in the  
421 IODP Proceedings for Expedition 334 [44][22].

### 422 *DNA Extraction and Sequencing and genomes binning*

423 DNA extraction and metagenomic sequencing have been described previously [22]and  
424 data have been deposited at NCBI GenBank SRA under project PRJEB11766. Metagenomic  
425 reads were quality trimmed using Nesonl following default parameter and applying q20 for  
426 quality score ([www.vicbioinformatics.com/software.nesonl.shtml](http://www.vicbioinformatics.com/software.nesonl.shtml)). Quality-controlled reads in  
427 individual samples were assembled separately using IDBA-UD[45] with default settings. Contigs  
428 longer than 1 kb were binned into MAGs using MaxBin V2.2.7[46]and further curated manually  
429 using VizBin[47]and through filtering outlier scaffolds not falling within the same GC% and  
430 differential coverage levels across different Costa Rica datasets. The quality and completeness of  
431 the MAGs were assessed using CheckM (v.1.0.7) [48]. MAGs from all give samples were de-  
432 replicated using dRep (version v2.0.5 with ANI > 99%)[49] and most complete MAG per taxon  
433 was selected for downstream analyses. Archaeal bins were further analyzed to determine their  
434 phylogenetic placements through the analysis of single copy marker genes using Phylosift[50]  
435 and 16 ribosomal proteins (see description below). Assembled contigs larger than 1kb were  
436 annotated using PROKKA[51]. Encoded proteins were predicted using Prodigal v2.6.3 with the  
437 default translation table (table 11) was applied[52].

### 438 *Concatenated ribosomal protein phylogeny*



439 A maximum-likelihood tree was calculated based on the concatenation of 16 ribosomal proteins  
440 (L2, L3, L4, L5, L6, L14, L15, L16, L18, L22, L24, S3, S8, S10, S17, and S19) using IQ-  
441 Tree[53] (located on the CIPRES web server)[54]. Reference sequences used were collected  
442 [12] with the addition of more representatives of the *Bathyarchaeota* and *Asgard* lineages.  
443 Evolutionary distances were calculated based on best fit substitution model (VT+F+R10), and  
444 single branch location was tested using 1000 ultrafast bootstraps and approximate Bayesian  
445 computation[55][53], branches with bootstrap support >80% were marked by black circles.

#### 446 ***Metabolic reconstruction and Functional annotation***

447 Predicted proteins from all MAGs were screened using HMMsearch tool against custom  
448 HMM databases representing the key genes for specific metabolic pathways [56]. The  
449 completion of the pathways was assessed through querying the predicted proteins against KEGG  
450 database using BlastKoala tool[57]. Carbohydrate-active enzymes (CAZymes) were identified  
451 using dbCAN-fam-HMMs (v6) database[58]. Cellular localizations of predicted proteins were  
452 identified using SignalP v5.0[59]. Proteases, peptidases, and peptidase inhibitors were identified  
453 using USEARCH-ublast tool[60] against the MEROPS database v12.1[61]. Transporters were  
454 identified using USEARCH-ublast tool[60] against the TCDB database[62]. Eukaryotic signature  
455 proteins were detected using Interpro v75.0[63]. Phylogenetic distributions of the predicted  
456 proteins in each bin were detected through comparing these proteins against the NCBI (nr)  
457 protein database via the DarkHorse software[23].

#### 458 ***Functional proteins-based trees***

459 All functional proteins-based trees were built by aligning the query proteins sequences to the  
460 reference sequences belonging to the same protein family using Muscle v3.8.31[64]. Reference  
461 sequences were collected from AnnoTree[30] using the corresponding KEGG entry as search

462 keyword. Aligned sequences were manually curated using Geneious v9.0.5  
463 (<https://www.geneious.com>). The phylogenetic trees were computed using IQ-TREE (v1.6.6)  
464 [53], through the CIPRES web server[52] and the evolutionary relationships were described  
465 using the best fit model. Branch locations were tested using 1000 ultrafast bootstraps and  
466 approximate Bayesian computation[55][53].

### 467 ***Thermodynamic calculations***

468 Initial Gibbs free energy ( $\Delta_r G'$ ) calculations were performed for the redox reactions proposed in  
469 the CR *Lokiarchaeota* and their potential partners using eQuilibrator[65] applying pH 8 similar  
470 to the approach reported in[42]and reactant concentrations 1mM each.

471 We further confirmed if the coupled redox reactions proposed for the novel CR *Lokiarchaeota*  
472 genomes were feasible, we calculated the Gibbs free energy of five redox reactions (Table S1)  
473 under the near in situ conditions at CR core U1378 and U1379, following the method described  
474 in LaRowe and Amend (2015)[66]. Gibbs free energy was calculated using the equation:

$$475 \Delta G_r = \Delta G_r^0 + RT \ln Q_r$$

476 where  $\Delta G_r^0$  and  $Q_r$  refer to the standard molar Gibbs energy and the reaction quotient of the  
477 indicated reaction, respectively,  $R$  represents the gas constant, and  $T$  denotes temperature in  
478 Kelvin. In this study,  $\Delta G_r^0$  was calculated using the thermodynamic data of standard Gibbs free  
479 energy of formation of each species and corrected to near *in situ* pressure and temperature (4°C),  
480 using the  $R$  package *CHNOSZ* [67].  $Q_r$  stands for the reaction quotient, which can be calculated  
481 with the relation

$$482 Q_r = \prod (a_i^{v_i})$$

483 where  $a_i$  is the activity of species  $i$  and  $v_i$  is its stoichiometric coefficient.  $a_i$  is the product of  
484 chemical species concentration  $[i]$  and its activity coefficient  $\gamma_i$ , which was computed as a function  
485 of temperature and ionic strength by using an extended version of the Debye-Huckel equation[68].

486 Because most of the reactant concentrations were hard to measure or were below detection limits,  
487 we assumed 0.1  $\mu\text{M}$  for the concentration of  $\text{NO}_3^-$ ,  $\text{NO}_2^-$ ,  $\text{SO}_3^{2-}$ , and  $\text{H}_2\text{S}$ . We considered a wide  
488 range of concentrations for benzoate ( $\text{C}_7\text{H}_5\text{O}_2^-$ ) (0.0001 – 100  $\mu\text{M}$ ), to explore the feasibility of  
489 these reactions over a wide range of substrate concentration changes.  
490

491 **Acknowledgements**

492 This work was funded by IODP 334 Post Expedition award T334A40, Exxon Mobil Research  
493 and Engineering, Penn State Astrobiology Research Center (through the NASA Astrobiology  
494 Institute, cooperative agreement #NNA09DA76A), the Pennsylvania Space Grant Consortium  
495 (NNX10AK74H), and a postdoctoral fellowship (RLZ) and graduate student fellowship (AJM)  
496 from NSF-funded Center for Dark Energy Biosphere investigations. This is CDEBI contribution  
497 # XXX.

498 We thank Frances O. Mark for valuable technical assistance.

499 **Author contributions**

500 J.B, I.F and R.L.Z. conceived the study. R.L.Z recovered the genomes from the metagenomic  
501 datasets. I.F, R.L.Z analyzed the genomic data. A.M and C.H collected the samples. R.Z revised  
502 the thermodynamic calculations and I.F., J.B and R.L.Z. wrote the manuscript with input from all  
503 authors. All documents were edited and approved by all authors.

504 **Competing interests**

505 The other authors declare no competing interests.

506 **Materials and Correspondence**

507 Correspondence and material requests should be addressed to Jennifer Biddle

508 <jfbiddle@udel.edu>.

509 **Data availability**

510 The genomes of this study have been made publicly available on GenBank under BioSample  
511 accessions (SAMN12695919- SAMN12695949). Metagenomes can be located at NCBI GenBank  
512 SRA under project PRJEB11766.

513

514 **References**

- 515 [1] A. Teske and K. B. Sørensen, “Uncultured archaea in deep marine subsurface sediments:  
516 have we caught them all?,” *ISME J.*, vol. 2, no. 1, pp. 3–18, Jan. 2008.
- 517 [2] J. F. Biddle *et al.*, “Heterotrophic Archaea dominate sedimentary subsurface ecosystems off  
518 Peru,” *Proc. Natl. Acad. Sci. U. S. A.*, vol. 103, no. 10, pp. 3846–3851, Mar. 2006.
- 519 [3] A. Schippers *et al.*, “Prokaryotic cells of the deep sub-seafloor biosphere identified as living  
520 bacteria,” *Nature*, vol. 433, no. 7028, pp. 861–864, Feb. 2005.
- 521 [4] J. S. Lipp, Y. Morono, F. Inagaki, and K.-U. Hinrichs, “Significant contribution of Archaea  
522 to extant biomass in marine subsurface sediments,” *Nature*, vol. 454, no. 7207, pp. 991–  
523 994, Aug. 2008.
- 524 [5] J. Buongiorno *et al.*, “Interlaboratory quantification of Bacteria and Archaea in deeply buried  
525 sediments of the Baltic Sea (IODP Expedition 347),” *FEMS Microbiol. Ecol.*, vol. 93, no. 3,  
526 01 2017.
- 527 [6] J. F. Biddle, S. Fitz-Gibbon, S. C. Schuster, J. E. Brenchley, and C. H. House, “Metagenomic  
528 signatures of the Peru Margin subseafloor biosphere show a genetically distinct  
529 environment,” *Proc. Natl. Acad. Sci. U. S. A.*, vol. 105, no. 30, pp. 10583–10588, Jul. 2008.
- 530 [7] N. H. Youssef, C. Rinke, R. Stepanauskas, I. Farag, T. Woyke, and M. S. Elshahed, “Insights  
531 into the metabolism, lifestyle and putative evolutionary history of the novel archaeal  
532 phylum ‘Diapherotrites,’” *ISME J.*, vol. 9, no. 2, pp. 447–460, Feb. 2015.
- 533 [8] I. F. Farag, N. H. Youssef, and M. S. Elshahed, “Global Distribution Patterns and  
534 Pangenomic Diversity of the Candidate Phylum ‘Latescibacteria’ (WS3),” *Appl. Environ.*  
535 *Microbiol.*, vol. 83, no. 10, 15 2017.

- 536 [9] K. Kubo, K. G. Lloyd, J. F Biddle, R. Amann, A. Teske, and K. Knittel, “Archaea of the  
537 Miscellaneous Crenarchaeotal Group are abundant, diverse and widespread in marine  
538 sediments,” *ISME J.*, vol. 6, no. 10, pp. 1949–1965, Oct. 2012.
- 539 [10] C. Rinke *et al.*, “Insights into the phylogeny and coding potential of microbial dark matter,”  
540 *Nature*, vol. 499, no. 7459, pp. 431–437, Jul. 2013.
- 541 [11] A. Spang *et al.*, “Complex archaea that bridge the gap between prokaryotes and  
542 eukaryotes,” *Nature*, vol. 521, no. 7551, pp. 173–179, May 2015.
- 543 [12] L. A. Hug *et al.*, “A new view of the tree of life,” *Nat. Microbiol.*, vol. 1, p. 16048, Apr.  
544 2016.
- 545 [13] C. J. Castelle and J. F. Banfield, “Major New Microbial Groups Expand Diversity and Alter  
546 our Understanding of the Tree of Life,” *Cell*, vol. 172, no. 6, pp. 1181–1197, 08 2018.
- 547 [14] K. Anantharaman *et al.*, “Thousands of microbial genomes shed light on interconnected  
548 biogeochemical processes in an aquifer system,” *Nat. Commun.*, vol. 7, p. 13219, 24 2016.
- 549 [15] K. Zaremba-Niedzwiedzka *et al.*, “Asgard archaea illuminate the origin of eukaryotic  
550 cellular complexity,” *Nature*, vol. 541, no. 7637, pp. 353–358, 19 2017.
- 551 [16] A. Spang *et al.*, “Proposal of the reverse flow model for the origin of the eukaryotic cell  
552 based on comparative analyses of Asgard archaeal metabolism,” *Nat. Microbiol.*, vol. 4, no.  
553 7, pp. 1138–1148, 2019.
- 554 [17] F. MacLeod, G. S. Kindler, H. L. Wong, R. Chen, and B. P. Burns, “Asgard archaea:  
555 Diversity, function, and evolutionary implications in a range of microbiomes,” *AIMS*  
556 *Microbiol.*, vol. 5, no. 1, pp. 48–61, 2019.
- 557 [18] K. W. Seitz *et al.*, “Asgard archaea capable of anaerobic hydrocarbon cycling,” *Nat.*  
558 *Commun.*, vol. 10, no. 1, p. 1822, 23 2019.

- 559 [19] Z. Zhou, J. Pan, F. Wang, J.-D. Gu, and M. Li, “Bathyarchaeota: globally distributed  
560 metabolic generalists in anoxic environments,” *FEMS Microbiol. Rev.*, vol. 42, no. 5, pp.  
561 639–655, 01 2018.
- 562 [20] P. N. Evans *et al.*, “Methane metabolism in the archaeal phylum Bathyarchaeota revealed  
563 by genome-centric metagenomics,” *Science*, vol. 350, no. 6259, pp. 434–438, Oct. 2015.
- 564 [21] Y. He *et al.*, “Genomic and enzymatic evidence for acetogenesis among multiple lineages  
565 of the archaeal phylum Bathyarchaeota widespread in marine sediments,” *Nat. Microbiol.*,  
566 vol. 1, no. 6, p. 16035, 04 2016.
- 567 [22] Amanda Martino, Matthew E. Rhodes, Rosa León-Zayas, Isabella E. Valente, Jennifer F.  
568 Biddle and Christopher H. House, “Microbial Diversity in Sub-Seafloor Sediments from the  
569 Costa Rica Margin,” *Geosciences*, vol. 9, p. 218, 2019.
- 570 [23] S. Podell and T. Gaasterland, “DarkHorse: a method for genome-wide prediction of  
571 horizontal gene transfer,” *Genome Biol.*, vol. 8, no. 2, p. R16, 2007.
- 572 [24] L. A. Levin *et al.*, “A hydrothermal seep on the Costa Rica margin: middle ground in a  
573 continuum of reducing ecosystems,” *Proc. Biol. Sci.*, vol. 279, no. 1738, pp. 2580–2588,  
574 Jul. 2012.
- 575 [25] R. U. Meckenstock *et al.*, “Anaerobic Degradation of Benzene and Polycyclic Aromatic  
576 Hydrocarbons,” *J. Mol. Microbiol. Biotechnol.*, vol. 26, no. 1–3, pp. 92–118, 2016.
- 577 [26] M. H. Stagers, S. E. Ruff, R. Amann, and K. Knittel, “High Diversity of Anaerobic Alkane-  
578 Degrading Microbial Communities in Marine Seep Sediments Based on (1-  
579 methylalkyl)succinate Synthase Genes,” *Front. Microbiol.*, vol. 6, p. 1511, 2015.

- 580 [27] B. Song and B. B. Ward, “Genetic diversity of benzoyl coenzyme A reductase genes  
581 detected in denitrifying isolates and estuarine sediment communities,” *Appl. Environ.*  
582 *Microbiol.*, vol. 71, no. 4, pp. 2036–2045, Apr. 2005.
- 583 [28] M. J. López Barragán *et al.*, “The bzd gene cluster, coding for anaerobic benzoate  
584 catabolism, in *Azoarcus* sp. strain CIB,” *J. Bacteriol.*, vol. 186, no. 17, pp. 5762–5774, Sep.  
585 2004.
- 586 [29] J.-M. Huang, B. J. Baker, J.-T. Li, and Y. Wang, “New Microbial Lineages Capable of  
587 Carbon Fixation and Nutrient Cycling in Deep-Sea Sediments of the Northern South China  
588 Sea,” *Appl. Environ. Microbiol.*, vol. 85, no. 15, Aug. 2019.
- 589 [30] K. Mandler, H. Chen, D. H. Parks, B. Lobb, L. A. Hug, and A. C. Doxey, “AnnoTree:  
590 visualization and exploration of a functionally annotated microbial tree of life,” *Nucleic*  
591 *Acids Res.*, vol. 47, no. 9, pp. 4442–4448, May 2019.
- 592 [31] C. Greening *et al.*, “Genomic and metagenomic surveys of hydrogenase distribution  
593 indicate H<sub>2</sub> is a widely utilised energy source for microbial growth and survival,” *ISME J.*,  
594 vol. 10, no. 3, pp. 761–777, Mar. 2016.
- 595 [32] A. Kouzuma, S. Kato, and K. Watanabe, “Microbial interspecies interactions: recent  
596 findings in syntrophic consortia,” *Front. Microbiol.*, vol. 6, p. 477, 2015.
- 597 [33] S. Pirbadian *et al.*, “*Shewanella oneidensis* MR-1 nanowires are outer membrane and  
598 periplasmic extensions of the extracellular electron transport components,” *Proc. Natl.*  
599 *Acad. Sci. U. S. A.*, vol. 111, no. 35, pp. 12883–12888, Sep. 2014.
- 600 [34] S. L. McCrindle, U. Kappler, and A. G. McEwan, “Microbial dimethylsulfoxide and  
601 trimethylamine-N-oxide respiration,” *Adv. Microb. Physiol.*, vol. 50, pp. 147–198, 2005.



- 602 [35] P. N. Evans *et al.*, “An evolving view of methane metabolism in the Archaea,” *Nat. Rev.*  
603 *Microbiol.*, vol. 17, no. 4, pp. 219–232, Apr. 2019.
- 604 [36] P. S. Adam, G. Borrel, and S. Gribaldo, “Evolutionary history of carbon monoxide  
605 dehydrogenase/acetyl-CoA synthase, one of the oldest enzymatic complexes,” *Proc. Natl.*  
606 *Acad. Sci. U. S. A.*, vol. 115, no. 6, pp. E1166–E1173, 06 2018.
- 607 [37] L. A. Hug *et al.*, “Community genomic analyses constrain the distribution of metabolic  
608 traits across the Chloroflexi phylum and indicate roles in sediment carbon cycling,”  
609 *Microbiome*, vol. 1, no. 1, p. 22, Aug. 2013.
- 610 [38] M. Mehrshad *et al.*, “Hidden in plain sight-highly abundant and diverse planktonic  
611 freshwater Chloroflexi,” *Microbiome*, vol. 6, no. 1, p. 176, 02 2018.
- 612 [39] B. B. Jørgensen and A. Boetius, “Feast and famine--microbial life in the deep-sea bed,”  
613 *Nat. Rev. Microbiol.*, vol. 5, no. 10, pp. 770–781, Oct. 2007.
- 614 [40] X. Dong *et al.*, “Metabolic potential of uncultured bacteria and archaea associated with  
615 petroleum seepage in deep-sea sediments,” *Nat. Commun.*, vol. 10, no. 1, p. 1816, 18 2019.
- 616 [41] Y.-F. Liu *et al.*, “Anaerobic hydrocarbon degradation in candidate phylum ‘Atribacteria’  
617 (JS1) inferred from genomics,” *ISME J.*, Jun. 2019.
- 618 [42] M. A. Lever, “Acetogenesis in the energy-starved deep biosphere - a paradox?,” *Front.*  
619 *Microbiol.*, vol. 2, p. 284, 2011.
- 620 [43] M. A. Mausz and Y. Chen, “Microbiology and Ecology of Methylated Amine Metabolism  
621 in Marine Ecosystems,” *Curr. Issues Mol. Biol.*, vol. 33, pp. 133–148, Jun. 2019.
- 622 [44] Vannucchi, P.; Ujiie, K.; Stroncik, N.; IODP Exp. 334 Scientific Party; Yatheesh, V.,  
623 “IODP expedition 334: An investigation of the sedimentary record, fluid flow and state of

- 624 stress on top of the seismogenic zone of an erosive subduction margin,” *Sci. Drill.*, vol.  
625 vol.15, pp. 23–30, 2013.
- 626 [45] Y. Peng, H. C. M. Leung, S. M. Yiu, and F. Y. L. Chin, “IDBA-UD: a de novo assembler  
627 for single-cell and metagenomic sequencing data with highly uneven depth,” *Bioinforma.*  
628 *Oxf. Engl.*, vol. 28, no. 11, pp. 1420–1428, Jun. 2012.
- 629 [46] Y.-W. Wu, Y.-H. Tang, S. G. Tringe, B. A. Simmons, and S. W. Singer, “MaxBin: an  
630 automated binning method to recover individual genomes from metagenomes using an  
631 expectation-maximization algorithm,” *Microbiome*, vol. 2, p. 26, 2014.
- 632 [47] C. C. Laczny *et al.*, “VizBin - an application for reference-independent visualization and  
633 human-augmented binning of metagenomic data,” *Microbiome*, vol. 3, no. 1, p. 1, 2015.
- 634 [48] D. H. Parks, M. Imelfort, C. T. Skennerton, P. Hugenholtz, and G. W. Tyson, “CheckM:  
635 assessing the quality of microbial genomes recovered from isolates, single cells, and  
636 metagenomes,” *Genome Res.*, vol. 25, no. 7, pp. 1043–1055, Jul. 2015.
- 637 [49] M. R. Olm, C. T. Brown, B. Brooks, and J. F. Banfield, “dRep: a tool for fast and accurate  
638 genomic comparisons that enables improved genome recovery from metagenomes through  
639 de-replication,” *ISME J.*, vol. 11, no. 12, pp. 2864–2868, 2017.
- 640 [50] A. E. Darling, G. Jospin, E. Lowe, F. A. Matsen, H. M. Bik, and J. A. Eisen, “PhyloSift:  
641 phylogenetic analysis of genomes and metagenomes,” *PeerJ*, vol. 2, p. e243, 2014.
- 642 [51] T. Seemann, “Prokka: rapid prokaryotic genome annotation,” *Bioinforma. Oxf. Engl.*, vol.  
643 30, no. 14, pp. 2068–2069, Jul. 2014.
- 644 [52] D. Hyatt, G.-L. Chen, P. F. Locascio, M. L. Land, F. W. Larimer, and L. J. Hauser,  
645 “Prodigal: prokaryotic gene recognition and translation initiation site identification,” *BMC*  
646 *Bioinformatics*, vol. 11, p. 119, Mar. 2010.

- 647 [53] L.-T. Nguyen, H. A. Schmidt, A. von Haeseler, and B. Q. Minh, “IQ-TREE: a fast and  
648 effective stochastic algorithm for estimating maximum-likelihood phylogenies,” *Mol. Biol.*  
649 *Evol.*, vol. 32, no. 1, pp. 268–274, Jan. 2015.
- 650 [54] M. A. Miller, W. Pfeiffer, and T. Schwartz, “Creating the CIPRES Science Gateway for  
651 inference of large phylogenetic trees,” *2010 Gatew. Comput. Environ. Workshop GCE*, pp.  
652 1–8, 2010.
- 653 [55] D. T. Hoang, O. Chernomor, A. von Haeseler, B. Q. Minh, and L. S. Vinh, “UFBoot2:  
654 Improving the Ultrafast Bootstrap Approximation,” *Mol. Biol. Evol.*, vol. 35, no. 2, pp.  
655 518–522, 01 2018.
- 656 [56] L. S. Johnson, S. R. Eddy, and E. Portugaly, “Hidden Markov model speed heuristic and  
657 iterative HMM search procedure,” *BMC Bioinformatics*, vol. 11, p. 431, Aug. 2010.
- 658 [57] M. Kanehisa, Y. Sato, and K. Morishima, “BlastKOALA and GhostKOALA: KEGG Tools  
659 for Functional Characterization of Genome and Metagenome Sequences,” *J. Mol. Biol.*, vol.  
660 428, no. 4, pp. 726–731, Feb. 2016.
- 661 [58] Y. Yin, X. Mao, J. Yang, X. Chen, F. Mao, and Y. Xu, “dbCAN: a web resource for  
662 automated carbohydrate-active enzyme annotation,” *Nucleic Acids Res.*, vol. 40, no. Web  
663 Server issue, pp. W445–451, Jul. 2012.
- 664 [59] J. J. Almagro Armenteros *et al.*, “SignalP 5.0 improves signal peptide predictions using  
665 deep neural networks,” *Nat. Biotechnol.*, vol. 37, no. 4, pp. 420–423, 2019.
- 666 [60] R. C. Edgar, “Search and clustering orders of magnitude faster than BLAST,” *Bioinforma.*  
667 *Oxf. Engl.*, vol. 26, no. 19, pp. 2460–2461, Oct. 2010.
- 668 [61] N. D. Rawlings, A. J. Barrett, P. D. Thomas, X. Huang, A. Bateman, and R. D. Finn, “The  
669 MEROPS database of proteolytic enzymes, their substrates and inhibitors in 2017 and a

- 670 comparison with peptidases in the PANTHER database,” *Nucleic Acids Res.*, vol. 46, no.  
671 D1, pp. D624–D632, 04 2018.
- 672 [62] M. H. Saier, V. S. Reddy, B. V. Tsu, M. S. Ahmed, C. Li, and G. Moreno-Hagelsieb, “The  
673 Transporter Classification Database (TCDB): recent advances,” *Nucleic Acids Res.*, vol. 44,  
674 no. D1, pp. D372-379, Jan. 2016.
- 675 [63] P. Jones *et al.*, “InterProScan 5: genome-scale protein function classification,” *Bioinforma.*  
676 *Oxf. Engl.*, vol. 30, no. 9, pp. 1236–1240, May 2014.
- 677 [64] R. C. Edgar, “MUSCLE: multiple sequence alignment with high accuracy and high  
678 throughput,” *Nucleic Acids Res.*, vol. 32, no. 5, pp. 1792–1797, 2004.
- 679 [65] A. Flamholz, E. Noor, A. Bar-Even, and R. Milo, “eQuilibrator--the biochemical  
680 thermodynamics calculator,” *Nucleic Acids Res.*, vol. 40, no. Database issue, pp. D770-775,  
681 Jan. 2012.
- 682 [66] D. E. LaRowe and J. P. Amend, “Catabolic rates, population sizes and  
683 doubling/replacement times of microorganisms in natural settings,” *Am. J. Sci.*, vol. 315,  
684 pp. 167–203, Mar. 2015.
- 685 [67] J. M. Dick, “Calculation of the relative metastabilities of proteins using the CHNOSZ  
686 software package,” *Geochem. Trans.*, vol. 9, p. 10, Oct. 2008.
- 687 [68] H. C. Helgeson, “Thermodynamics of hydrothermal systems at elevated temperatures and  
688 pressures,” *Am. J. Sci.*, vol. 267, pp. 729–804, Sep. 1969.
- 689

**Table 1. Details of the genomes constructed from the Costa Rica Margin**

| Bin_ID | Dataset     | Marker lineage         | Phylogenetic affiliation   | Completeness | completeness_metric | Contamination | Strain heterogeneity | Genome size (Mbp) | # scaffolds | GC   | GC std (scaffolds > 1kbp) | Coverage |
|--------|-------------|------------------------|----------------------------|--------------|---------------------|---------------|----------------------|-------------------|-------------|------|---------------------------|----------|
| CR_01  | 1378_2mbsf  | k_Archaea (UID2)       | Bathyarchaeota             | 38.71        | partial             | 10.09         | 59.09                | 0.62              | 335         | 39   | 6.02                      | 155.6    |
| CR_02  | 1378_2mbsf  | k_Archaea (UID2)       | Bathyarchaeota             | 45.64        | partial             | 5.61          | 16.67                | 1.05              | 225         | 38.7 | 0                         | 29.9     |
| CR_03  | 1378_2mbsf  | p_Euryarchaeota (UID3) | Hadesarchaea               | 74.86        | substantial         | 10.67         | 50                   | 0.98              | 333         | 40.2 | 6.68                      | 19.3     |
| CR_04  | 1378_2mbsf  | k_Archaea (UID2)       | Bathyarchaeota             | 60.62        | moderate            | 10.08         | 5.88                 | 1.09              | 368         | 42.7 | 4.79                      | 16.05    |
| CR_05  | 1378_2mbsf  | k_Archaea (UID2)       | Bathyarchaeota (RPL2)      | 65.2         | moderate            | 10.26         | 0                    | 1.92              | 900         | 40.9 | 0                         | 11.4     |
| CR_06  | 1378_32mbsf | k_Archaea (UID2)       | Asgard (Lokiarchaeota)     | 86.78        | substantial         | 1.87          | 33.33                | 2.41              | 1110        | 42.7 | 11.06                     | 216.64   |
| CR_07  | 1378_32mbsf | k_Archaea (UID2)       | Asgard (Lokiarchaeota)     | 47.66        | partial             | 5.43          | 63.64                | 1.525             | 829         | 41.9 | 0                         | 72.54    |
| CR_08  | 1378_32mbsf | k_Archaea (UID2)       | Asgard (Lokiarchaeota)     | 61.06        | moderate            | 9.65          | 20                   | 3.54              | 693         | 42.9 | 8.76                      | 71.06    |
| CR_09  | 1378_32mbsf | k_Archaea (UID2)       | Bathyarchaeota             | 41.64        | partial             | 0             | 0                    | 3.6               | 89          | 39.3 | 0                         | 30.63    |
| CR_10  | 1378_32mbsf | k_Archaea (UID2)       | Asgard (Lokiarchaeota)     | 32.81        | partial             | 10.6          | 23.33                | 2.91              | 1865        | 43.3 | 6.55                      | 24.53    |
| CR_11  | 1378_32mbsf | k_Archaea (UID2)       | Asgard (Heimdallarchaeota) | 94.39        | near                | 9.06          | 0                    | 3.47              | 167         | 38.6 | 7.88                      | 23.11    |
| CR_12  | 1378_32mbsf | k_Archaea (UID2)       | Asgard (Thorarchaeota)     | 32.05        | partial             | 1.08          | 0                    | 1.49              | 1019        | 38.8 | 0                         | 10.48    |
| CR_13  | 1379_22mbsf | k_Archaea (UID2)       | Bathyarchaeota             | 35.05        | partial             | 0             | 0                    | 0.3               | 118         | 39.2 | 0                         | 116.39   |
| CR_14  | 1379_22mbsf | k_Archaea (UID2)       | Bathyarchaeota             | 95.64        | near                | 4.15          | 0                    | 2.49              | 140         | 39.4 | 7.77                      | 77.12    |
| CR_15  | 1379_22mbsf | k_Archaea (UID2)       | Bathyarchaeota             | 92.61        | near                | 3.12          | 0                    | 2.11              | 130         | 39   | 5.31                      | 47.44    |
| CR_16  | 1379_22mbsf | k_Archaea (UID2)       | Bathyarchaeota             | 36.14        | partial             | 0             | 0                    | 2.99              | 59          | 39.4 | 7.03                      | 47.78    |
| CR_17  | 1379_22mbsf | k_Archaea (UID2)       | Bathyarchaeota             | 71.03        | substantial         | 6.54          | 0                    | 0.88              | 28          | 39.4 | 7.51                      | 26.16    |
| CR_18  | 1379_22mbsf | k_Archaea (UID2)       | Bathyarchaeota (RPL2)      | 42.3         | partial             | 5.61          | 0                    | 1.13              | 103         | 40.8 | 6.46                      | 24.29    |
| CR_19  | 1379_22mbsf | k_Archaea (UID2)       | Bathyarchaeota             | 35.84        | partial             | 5.99          | 0                    | 1.03              | 340         | 41   | 0                         | 13.83    |
| CR_20  | 1379_22mbsf | k_Archaea (UID2)       | Bathyarchaeota             | 58.35        | moderate            | 2.8           | 0                    | 1.01              | 184         | 41   | 6.38                      | 18.65    |
| CR_21  | 1379_22mbsf | k_Archaea (UID2)       | Bathyarchaeota             | 38.51        | partial             | 1.94          | 0                    | 0.58              | 249         | 41.8 | 5.06                      | 17.31    |
| CR_22  | 1379_22mbsf | k_Archaea (UID2)       | Bathyarchaeota             | 42.88        | partial             | 9.88          | 15.38                | 1.31              | 344         | 38.6 | 3.12                      | 19.48    |

|       |             |                            |                       |       |             |      |       |      |     |      |      |       |
|-------|-------------|----------------------------|-----------------------|-------|-------------|------|-------|------|-----|------|------|-------|
| CR 23 | 1379 22mbsf | p__Euryarchaeota<br>(UID3) | Thermoplasmata        | 62.44 | moderate    | 2.4  | 0     | 1.96 | 284 | 43.1 | 5.55 | 19.88 |
| CR 24 | 1379 22mbsf | k__Archaea (UID2)          | Bathyarchaeota        | 53.74 | partial     | 6.31 | 0     | 2.36 | 556 | 41.8 | 3.38 | 17.98 |
| CR 25 | 1379 22mbsf | k__Archaea (UID2)          | Bathyarchaeota (RPS3) | 56.65 | moderate    | 1.94 | 0     | 1.68 | 531 | 39.6 | 3.35 | 13.92 |
| CR 26 | 1379 22mbsf | k__Archaea (UID2)          | Hadesarchaea          | 50.96 | moderate    | 7.79 | 0     | 0.58 | 329 | 39.6 | 0    | 14.9  |
| CR 27 | 1379 45mbsf | k__Archaea (UID2)          | Bathyarchaeota        | 79.77 | substantial | 5.49 | 33.33 | 1.24 | 404 | 39.8 | 4.19 | 63.85 |
| CR 28 | 1379 45mbsf | k__Archaea (UID2)          | Bathyarchaeota        | 32.78 | partial     | 6.15 | 0     | 1.25 | 296 | 39.1 | 8.11 | 45.38 |
| CR 29 | 1379 45mbsf | k__Archaea (UID2)          | Bathyarchaeota        | 56.96 | moderate    | 0.97 | 100   | 0.7  | 154 | 37.7 | 7.52 | 40.92 |
| CR 30 | 1379 45mbsf | k__Archaea (UID2)          | Bathyarchaeota        | 49.54 | partial     | 3.4  | 28.57 | 4    | 191 | 40   | 0    | 21.23 |
| CR 31 | 1379 45mbsf | p__Euryarchaeota<br>(UID4) | Hadesarchaea          | 31.55 | partial     | 0.64 | 33.33 | 3.75 | 176 | 40.2 | 0    | 25.74 |
