# Supplementary material for: Genomic expansion of archaeal lineages resolved from deep Costa Rica sediments
Source: bioRxiv or medRxiv preprint supplement (doi:10.1101/763623), 2019-09-09
Supplement: Supplementary file [file media-1.pdf]

## **Genomic expansion of archaeal lineages resolved from deep Costa Rica sediments**

Ibrahim F. Farag<sup>1</sup>, Jennifer F. Biddle<sup>1</sup>, Rui Zhao<sup>1</sup>, Amanda J. Martino<sup>2</sup>, Christopher H. House<sup>3</sup>,

Rosa I. León-Zayas<sup>1,4</sup>

<sup>1</sup>School of Marine Science and Policy, University of Delaware, Lewes DE 19968

<sup>2</sup>Department of Biology, St. Francis University, Loretto PA 15940

<sup>3</sup>Department of Geosciences, Pennsylvania State University, University Park PA 16802

<sup>4</sup>Department of Biology, Willamette University, Salem OR 97301

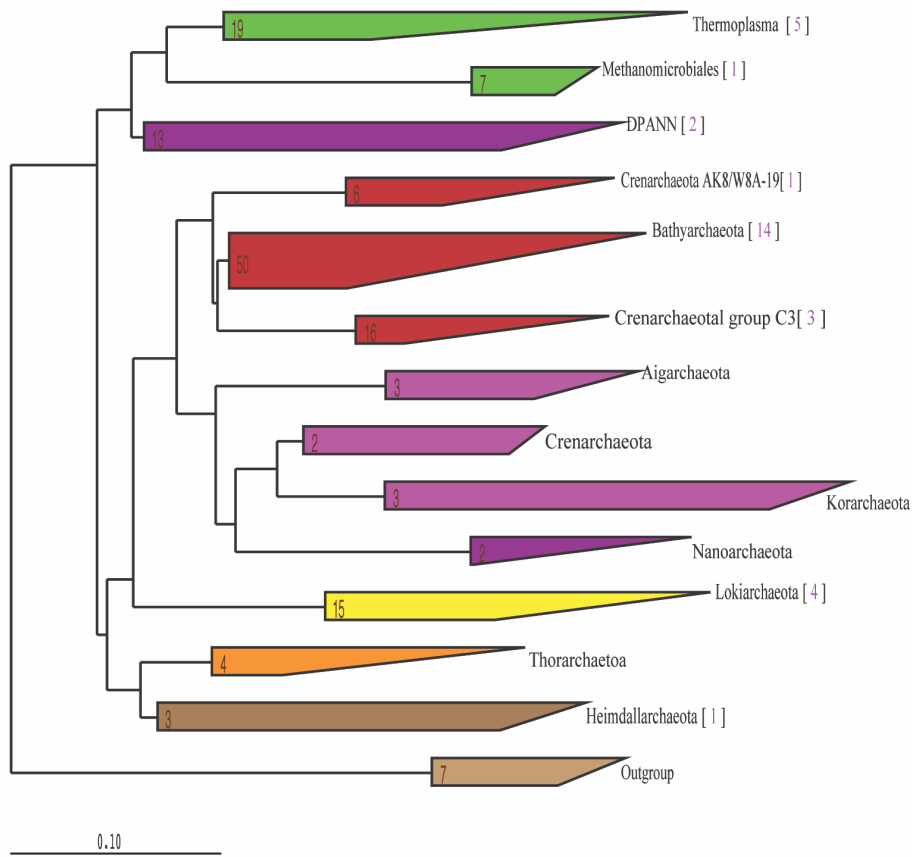

**Figure S1. Phylogenetic placement of the 16S rRNA gene sequences recovered from Costa Rica metagenomes.** The maximum likelihood phylogenetic tree was calculated using ARB. Numbers in the parentheses are the number of 16S rRNA gene sequences recovered from CR metagenomes included in each phylogenetic group.

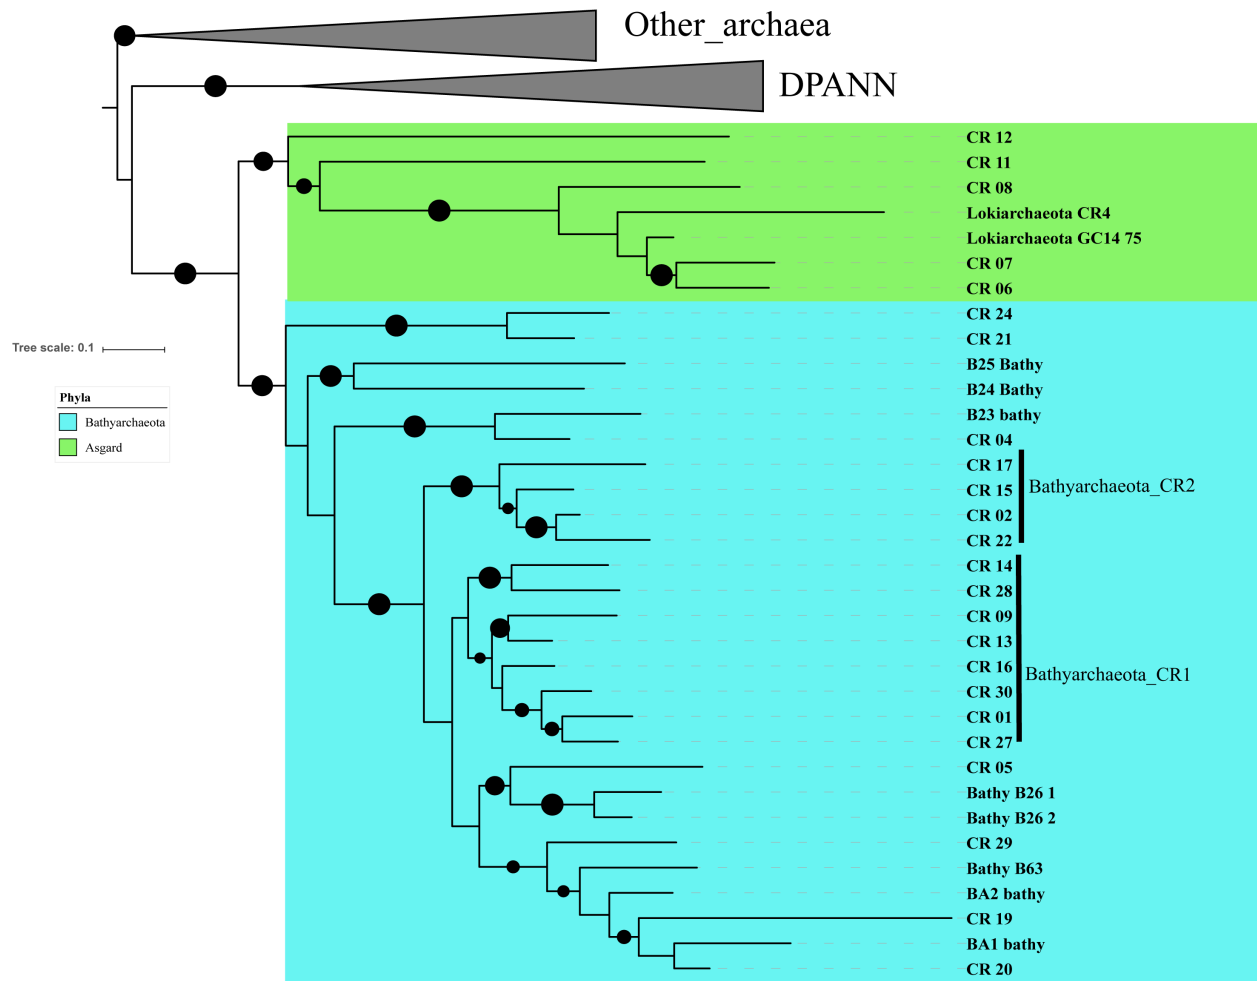

**Figure S2. (A) Phylogenetic placement of the Costa Rica *Bathyarchaeota* and *Lokiarchaeota* MAGs.** The maximum-likelihood phylogenetic tree was calculated based on the concatenation of 16 ribosomal proteins (L2, L3, L4, L5, L6, L14, L15, L16, L18, L22, L24, S3, S8, S10, S17, and S19). “*Bathyarchaeota\_CR1*” and “*Bathyarchaeota\_CR2*” represent two novel classes within the phylum *Bathyarchaeota*. The relationships were inferred using the best fit substitution model (WAG+F+R6) and nodes with bootstrap support >80% were marked by black circles. Scale bar indicates substitutions per site.

## Lokiarchaeota\_CR06

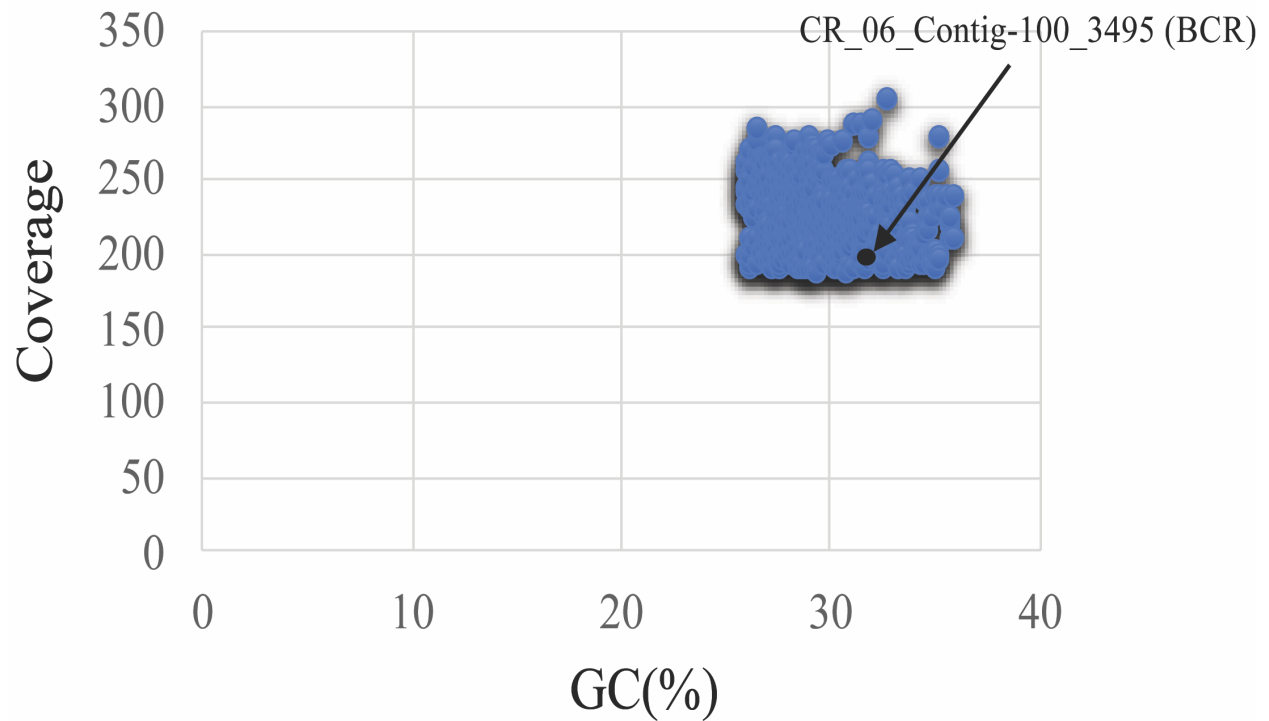

**Figure S3. Coverage and GC (%) range of the contigs within Lokiarchaeota (CR\_06)**

**MAG.** CR\_06\_Contig-100\_3495 encodes for the BCR operon and is highlighted by the black dot.

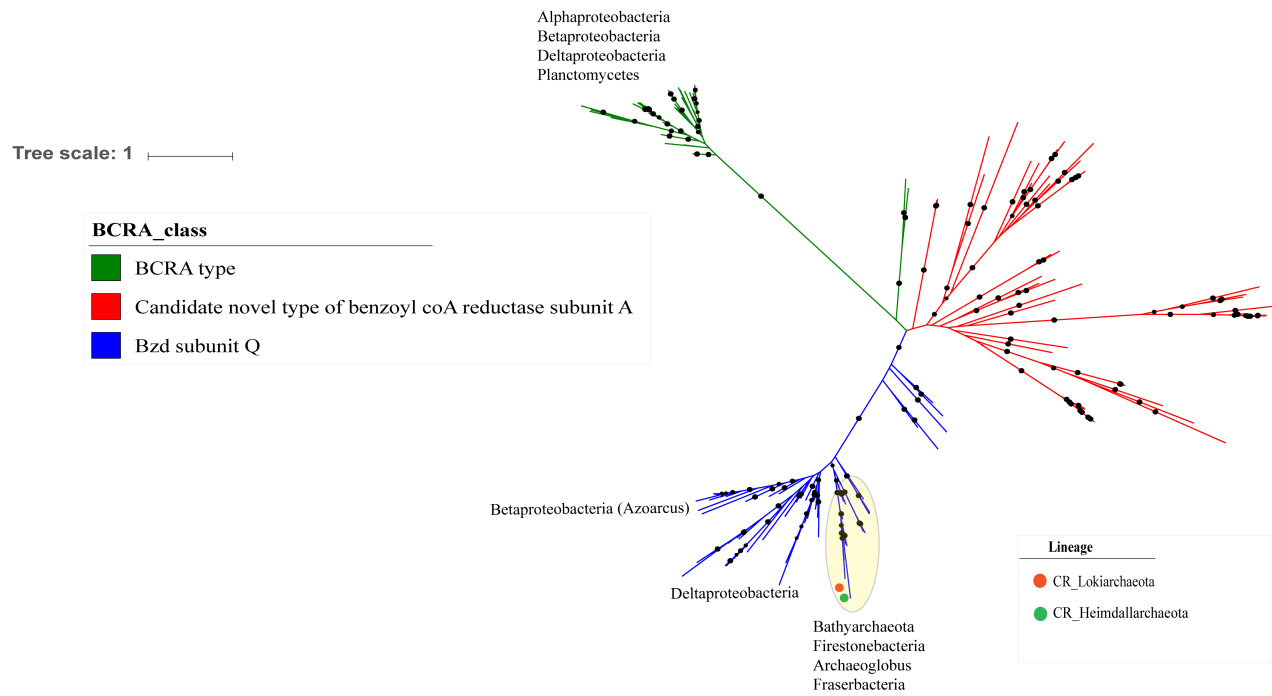

**Figure S4. Maximum likelihood tree of the benzoyl-CoA reductase subunit A.** The tree was calculated using the best fit substitution model (LG+R6) that describes the evolutionary relationships between BCRA families implemented in IQ-Tree [1]. The tree was made using reference sequences under the KEGG entry (K04114) collected from AnnoTree [2] and branch location was tested using 1000 ultrafast bootstraps and approximate Bayesian computation, branches with bootstrap support >80% were marked by black circles. Blue and green clades highlight sequences belong to Bzd\_Q and BCR\_A subfamilies, respectively. Scale bar indicates substitutions per site. Sequences from CR\_Lokiarchaeota MAGs were marked with red circles, and CR\_Heimdallarchaeota was marked with green. Candidate novel clades present in the Costa Rica metagenomic datasets were colored red.

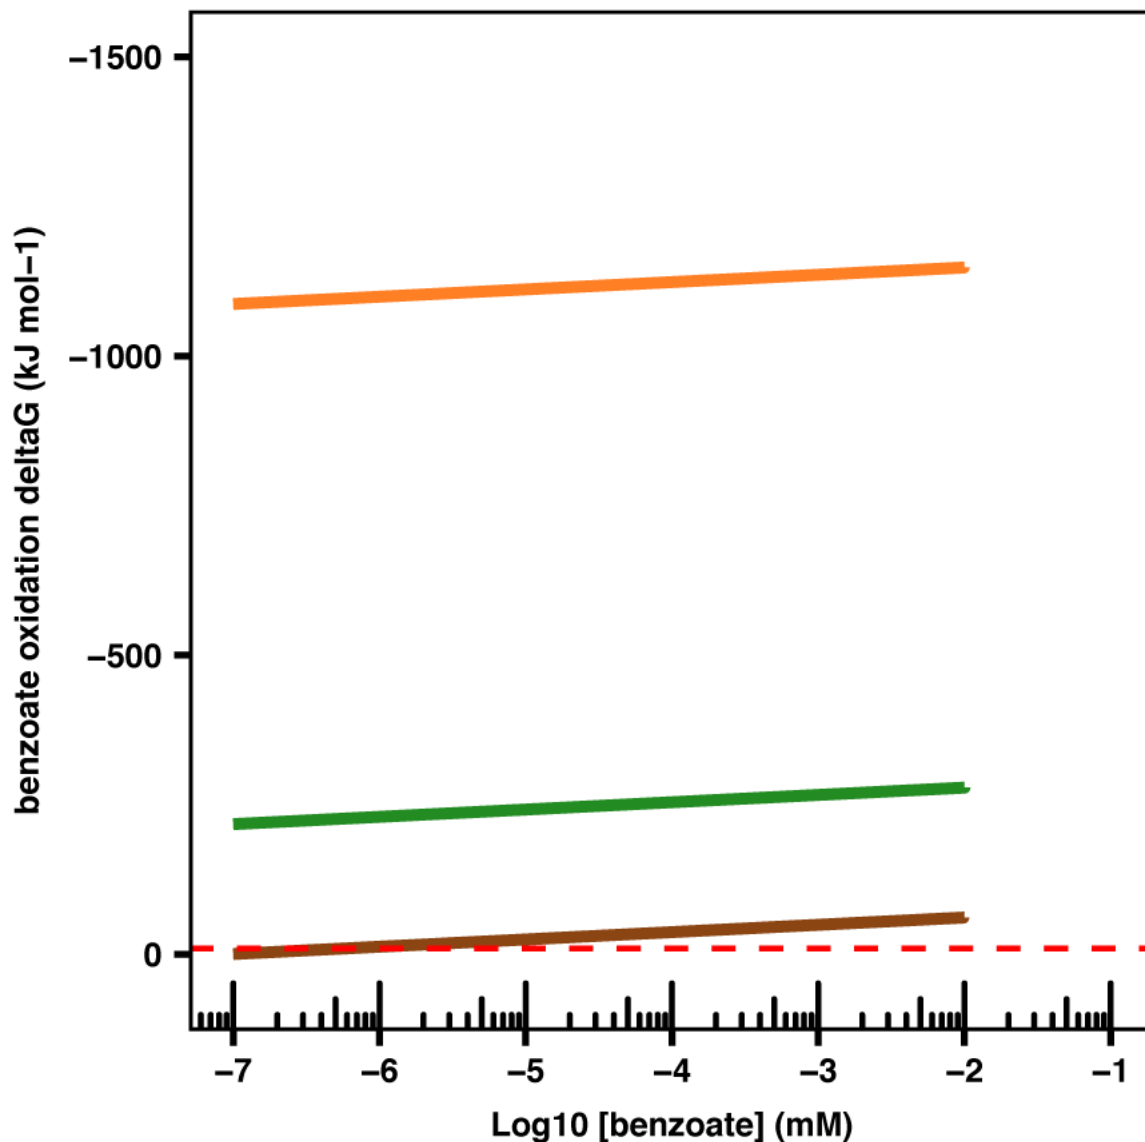

**Figure S5. Gibbs free energy of the proposed catabolic reactions of Lokiarchaeota (CR\_06) under the near in situ condition.** Gibbs free energy of benzoate oxidation coupled to the reduction of nitrate (brown line), nitrite (orange line), and sulfite (green line), with the benzoate concentration varying in a wide range ( $10^{-4}$ – $10 \mu\text{M}$ ). Benzoate oxidation coupled to sulfate reduction was calculated to be thermodynamic unfavorable, both under standard condition and the in-situ condition in subseafloor sediments at Costa Rica Margin. The red dashed line indicate the theoretical minimal energy quantum of life [ $-10 \text{ kJ mol}^{-1}$ ][3]

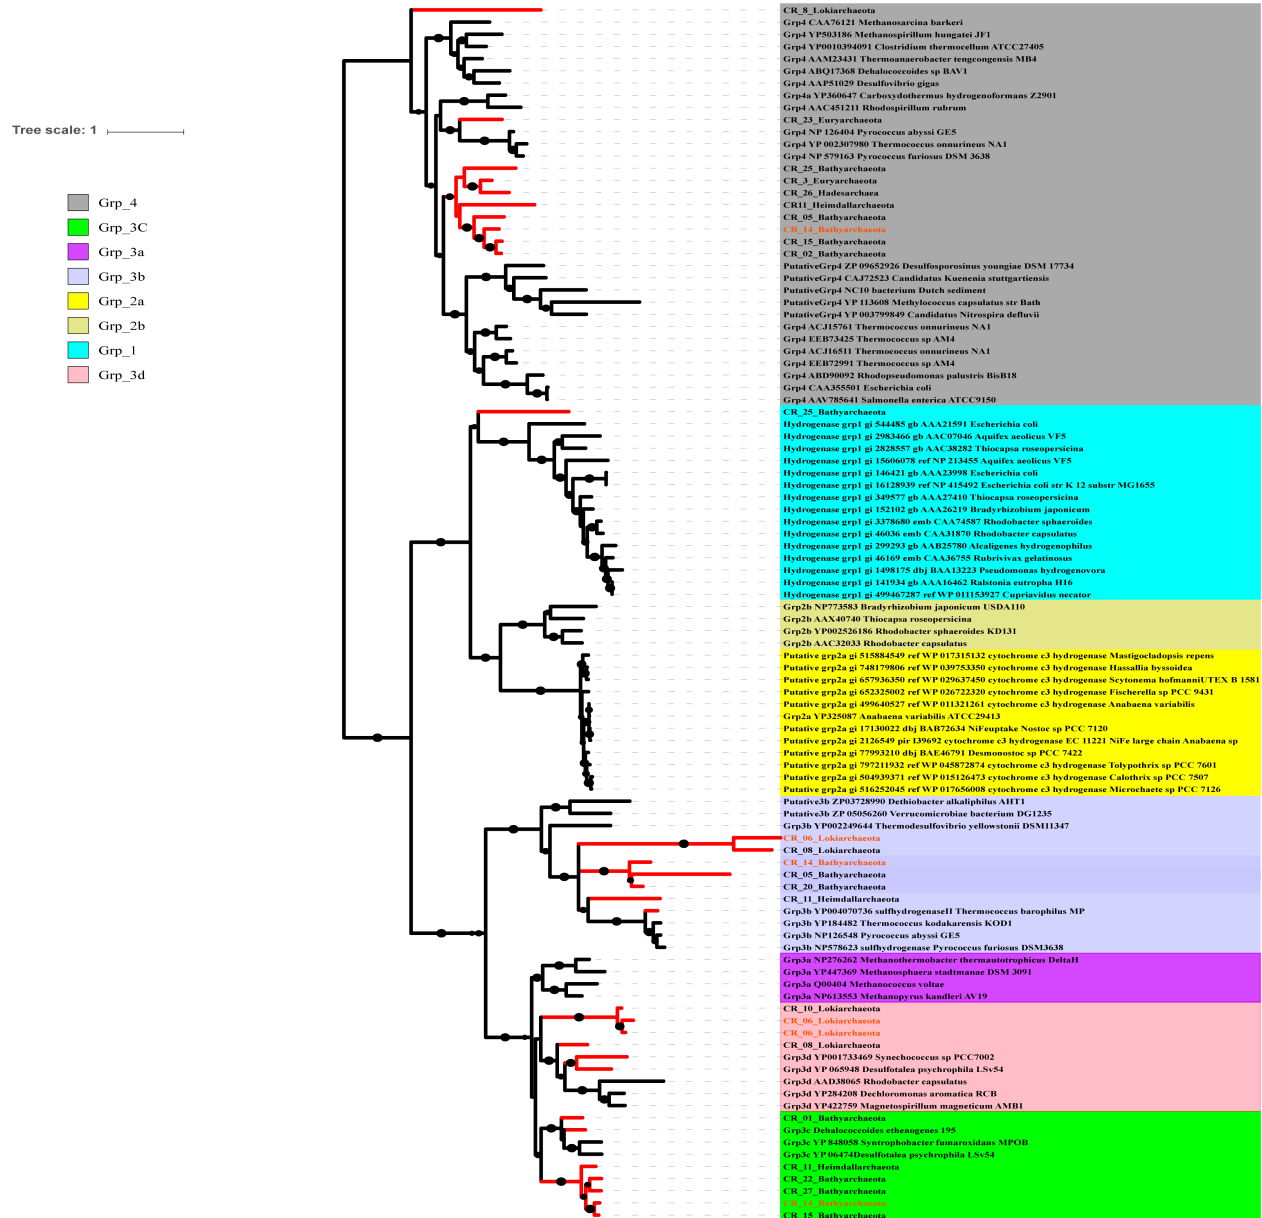

**Figure S6. Maximum likelihood phylogenetic tree of the [NiFe] hydrogenases recovered from CR\_MAGs.** The relationships were inferred using the best fit substitution model (LG+R6) and nodes with bootstrap support >80% were marked by black circles. Scale bar indicates substitutions per site. Hydrogenase protein sequences from CR\_MAGs are highlighted with red branches. Reference sequences used were collected from (Greening et al. 2016)[4].

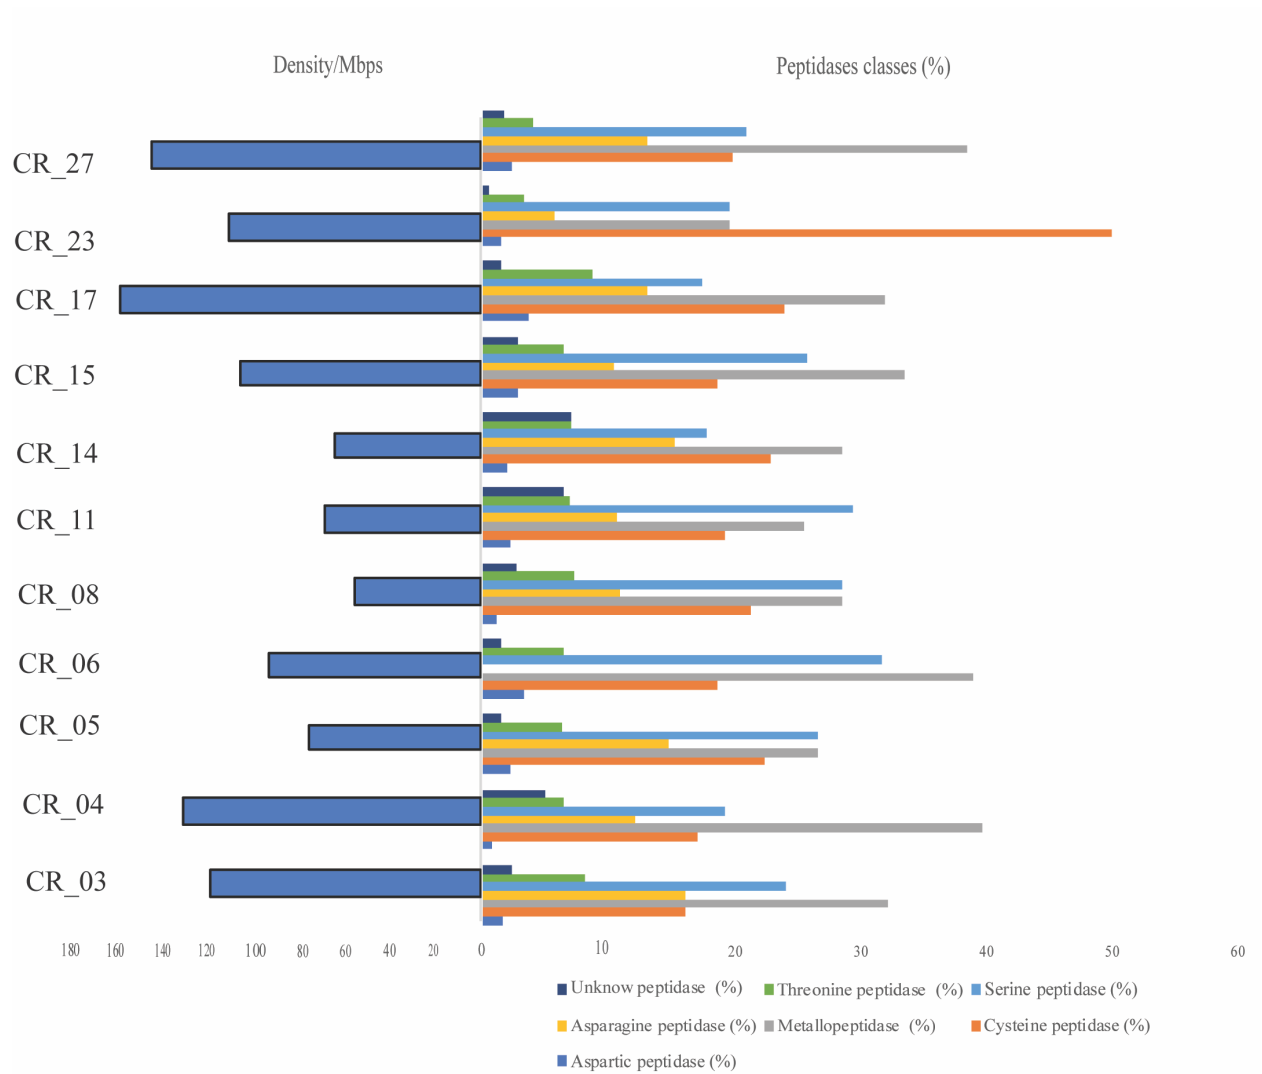

**Figure S7.** (Left panel) Relative densities (numbers per 1 Mb) of peptidases in the CR\_MAGs with >60% completeness. (Right panel) abundance percentages of each peptidase class within different Costa Rica MAGs.



**Table S1. Gibbs free energy of couple redox reactions proposed for the CR\_ *Lokiarchaeota* MAG (CR\_06).**

| Reaction                                                                   | Equation                                                                             | $\Delta G^\circ$ (kJ mol <sup>-1</sup> ) |
|----------------------------------------------------------------------------|--------------------------------------------------------------------------------------|------------------------------------------|
| <b>Benzoate oxidation coupled to nitrate reduction to nitrite</b>          | $[C_7H_5O_2^-] + 3[NO_3^-] + 9[H_2O] \rightarrow 3[NO_2^-] + 7[CO_2] + 24 e^-$       | -119.9                                   |
| <b>Benzoate oxidation coupled to nitrite reduction to ammonia</b>          | $[C_7H_5O_2^-] + 3[NO_2^-] + 6[H_2O] \rightarrow 3[NH_4^+] + 7[CO_2] + 12 e^-$       | -1206.3                                  |
| <b>Benzoate oxidation coupled to sulfate reduction</b>                     | $[C_7H_5O_2^-] + 3[SO_4^{2-}] + 9[H_2O] \rightarrow 3[SO_3^{2-}] + 7[CO_2] + 24 e^-$ | 416.1                                    |
| <b>Benzoate oxidation coupled to sulfite reduction to hydrogen sulfide</b> | $[C_7H_5O_2^-] + 3[SO_3^{2-}] + 3[H_2O] \rightarrow 3[H_2S] + 7[CO_2] + 12 e^-$      | -373.6                                   |
| <b>Benzoate oxidation to acetate</b>                                       | $2[C_7H_5O_2^-] + 10[H_2O] \rightarrow 7[C_2H_3O_2^-] + 2 e^-$                       | 196.3                                    |

**Table S2. ANI Comparisons between Costa Rica *Bathyarchaeota* MAG CR\_14 against reference *Bathyarchaeota* MAGs.**

| <b>CR genome</b> | <b>Reference genome</b> | <b>Distance</b> | <b>Similarity</b> |
|------------------|-------------------------|-----------------|-------------------|
| CR_14            | B23                     | 0.295981        | 0.704019          |
| CR_14            | B25                     | 0.295981        | 0.704019          |
| CR_14            | B63                     | 1               | 0                 |
| CR_14            | BA2                     | 0.295981        | 0.704019          |
| CR_14            | B24                     | 0.295981        | 0.704019          |
| CR_14            | B26                     | 1               | 0                 |
| CR_14            | BA1                     | 1               | 0                 |
| CR_14            | B26                     | 1               | 0                 |

**Table S3. ANI comparisons between CR MAGs**

**Table S4. Function annotation of CR\_06 proteins using KEGG database**

**Table S5. Function annotation of CR\_14 proteins using KEGG database**

**Table S6. HMM searches against key metabolic genes to validate the presence/absence of the pathways in CR-metagenomes**

**Tables S3, S4, S5 and S6 are provided as a separate excel spreadsheet.**

## References

- [1] L.-T. Nguyen, H. A. Schmidt, A. von Haeseler, and B. Q. Minh, “IQ-TREE: a fast and effective stochastic algorithm for estimating maximum-likelihood phylogenies,” *Mol. Biol. Evol.*, vol. 32, no. 1, pp. 268–274, Jan. 2015.
- [2] K. Mandler, H. Chen, D. H. Parks, B. Lobb, L. A. Hug, and A. C. Doxey, “AnnoTree: visualization and exploration of a functionally annotated microbial tree of life,” *Nucleic Acids Res.*, vol. 47, no. 9, pp. 4442–4448, May 2019.
- [3] V. Müller and V. Hess, “The Minimum Biological Energy Quantum,” *Front. Microbiol.*, vol. 8, p. 2019, 2017.
- [4] C. Greening *et al.*, “Genomic and metagenomic surveys of hydrogenase distribution indicate H<sub>2</sub> is a widely utilised energy source for microbial growth and survival,” *ISME J.*, vol. 10, no. 3, pp. 761–777, Mar. 2016.
